# Supplementary material for: Single step, high yield synthesis of para-hydroxy functionalized POCOP ligands and their Ni(ii) pincer derivatives
Source: Royal Society of Chemistry journal article supplement (doi:10.1039/c5nj00052a), 2015-01-01
Supplement: c5nj00052a1.pdf [file c5nj00052a1.pdf]

**Supporting Information**

**NMR spectra from compounds 1-10**

**Single Step, High Yield Synthesis of *para*-Hydroxy Functionalized POCOP Ligands and their Ni(II) Pincer Derivatives.**

Marco A. García-Eleno, Esteban Padilla-Mata, Fabiola Estudiante-Negrete, Francisco Pichal-Cerda, Simón Hernández-Ortega, Rubén A. Toscano and David Morales-Morales\*

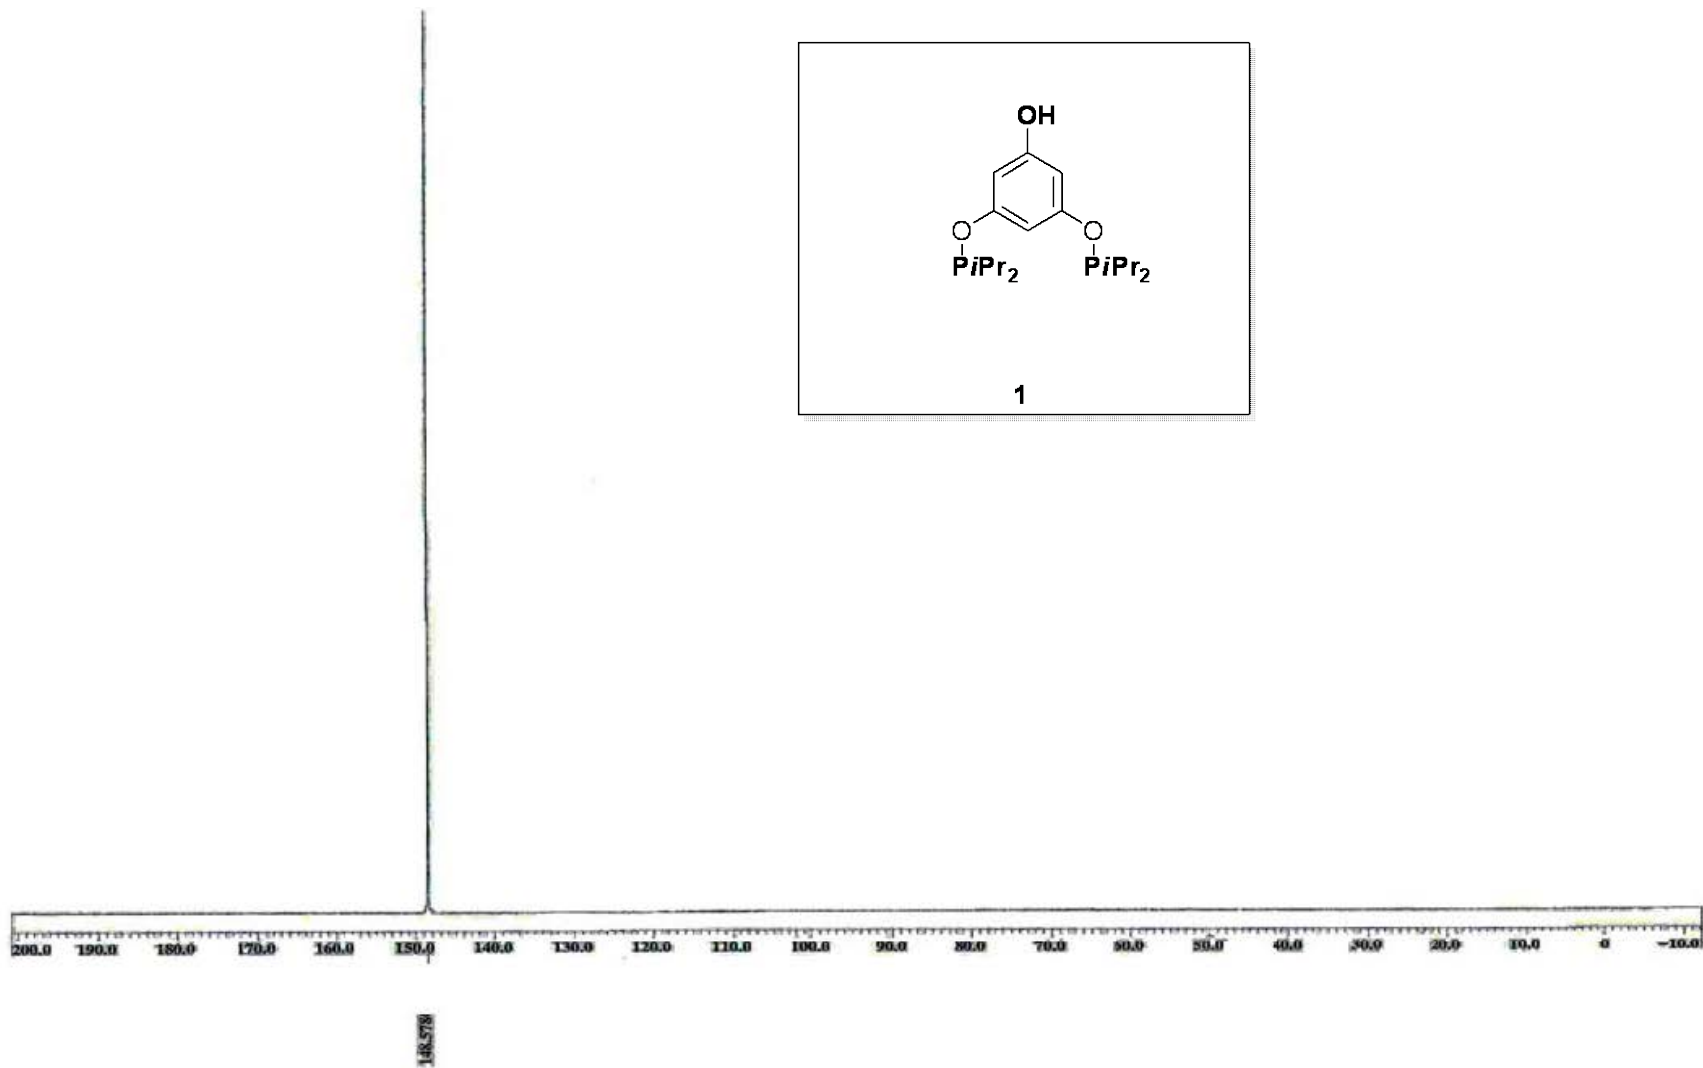

$^{31}\text{P}$  NMR ( $\text{CDCl}_3$ , 25 °C, 121.65 Hz) spectrum of compound 1.

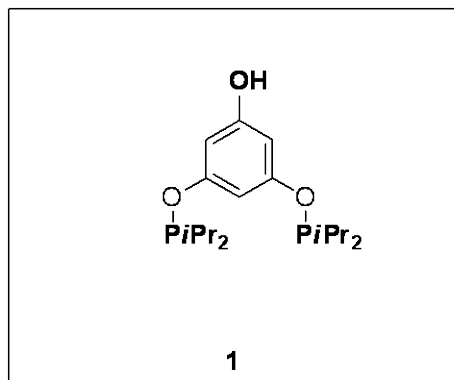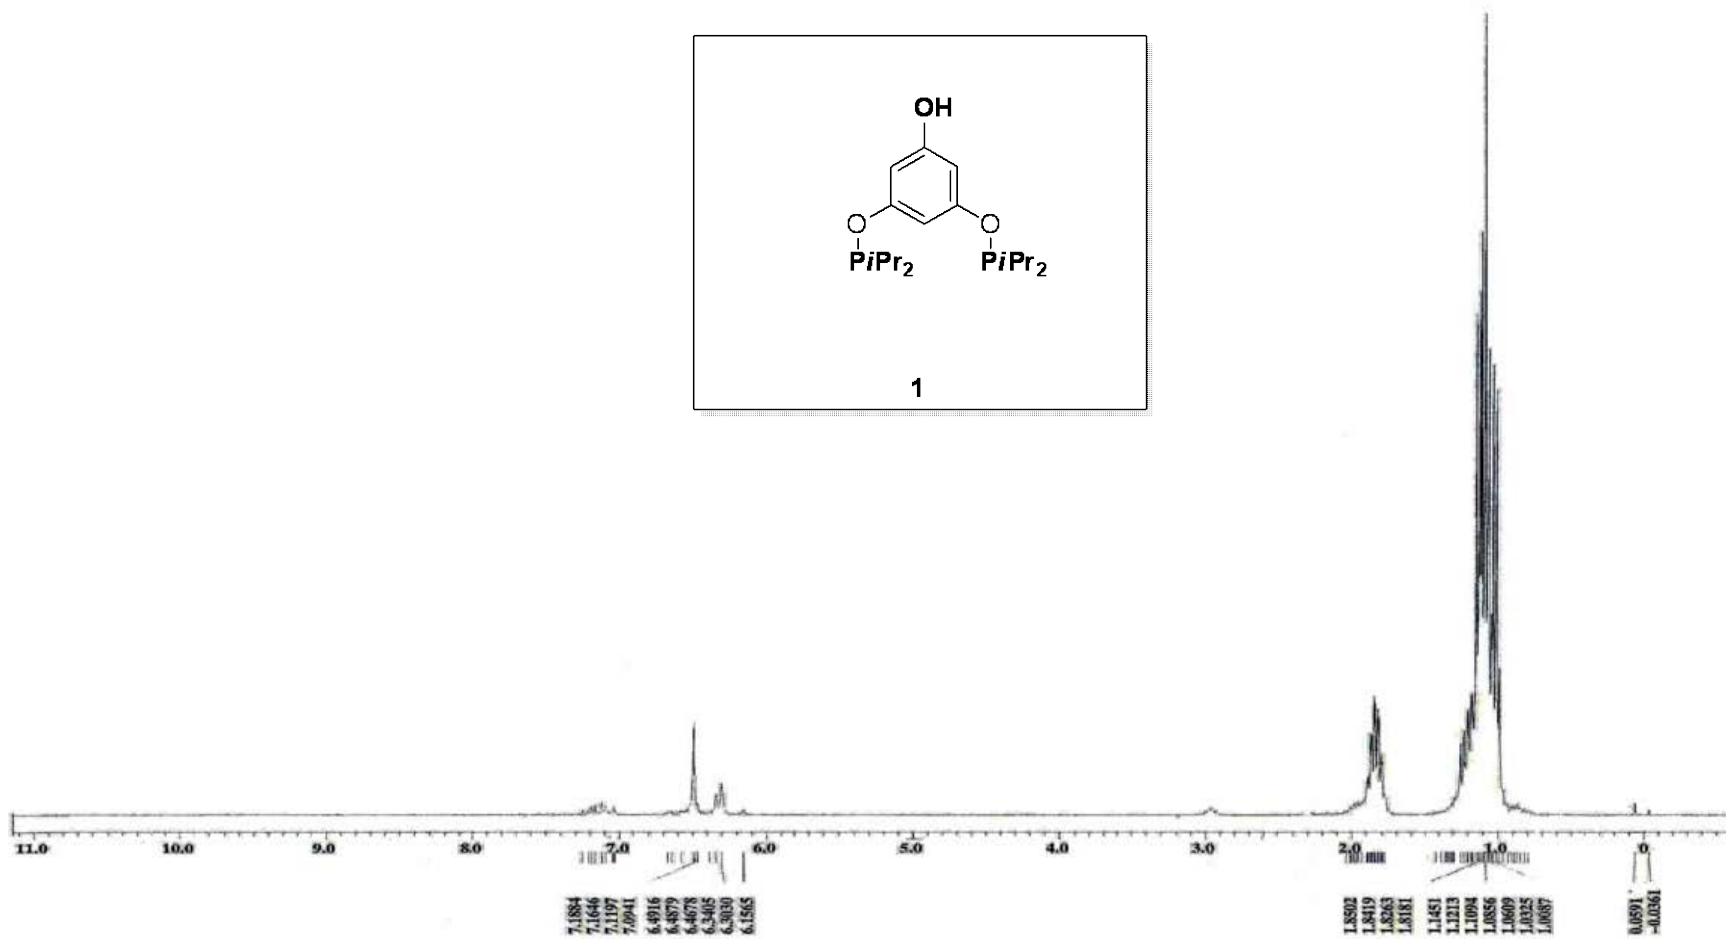

$^1\text{H}$  NMR ( $\text{CDCl}_3$ , 25 °C, 300.52 Hz) spectrum of compound 1.

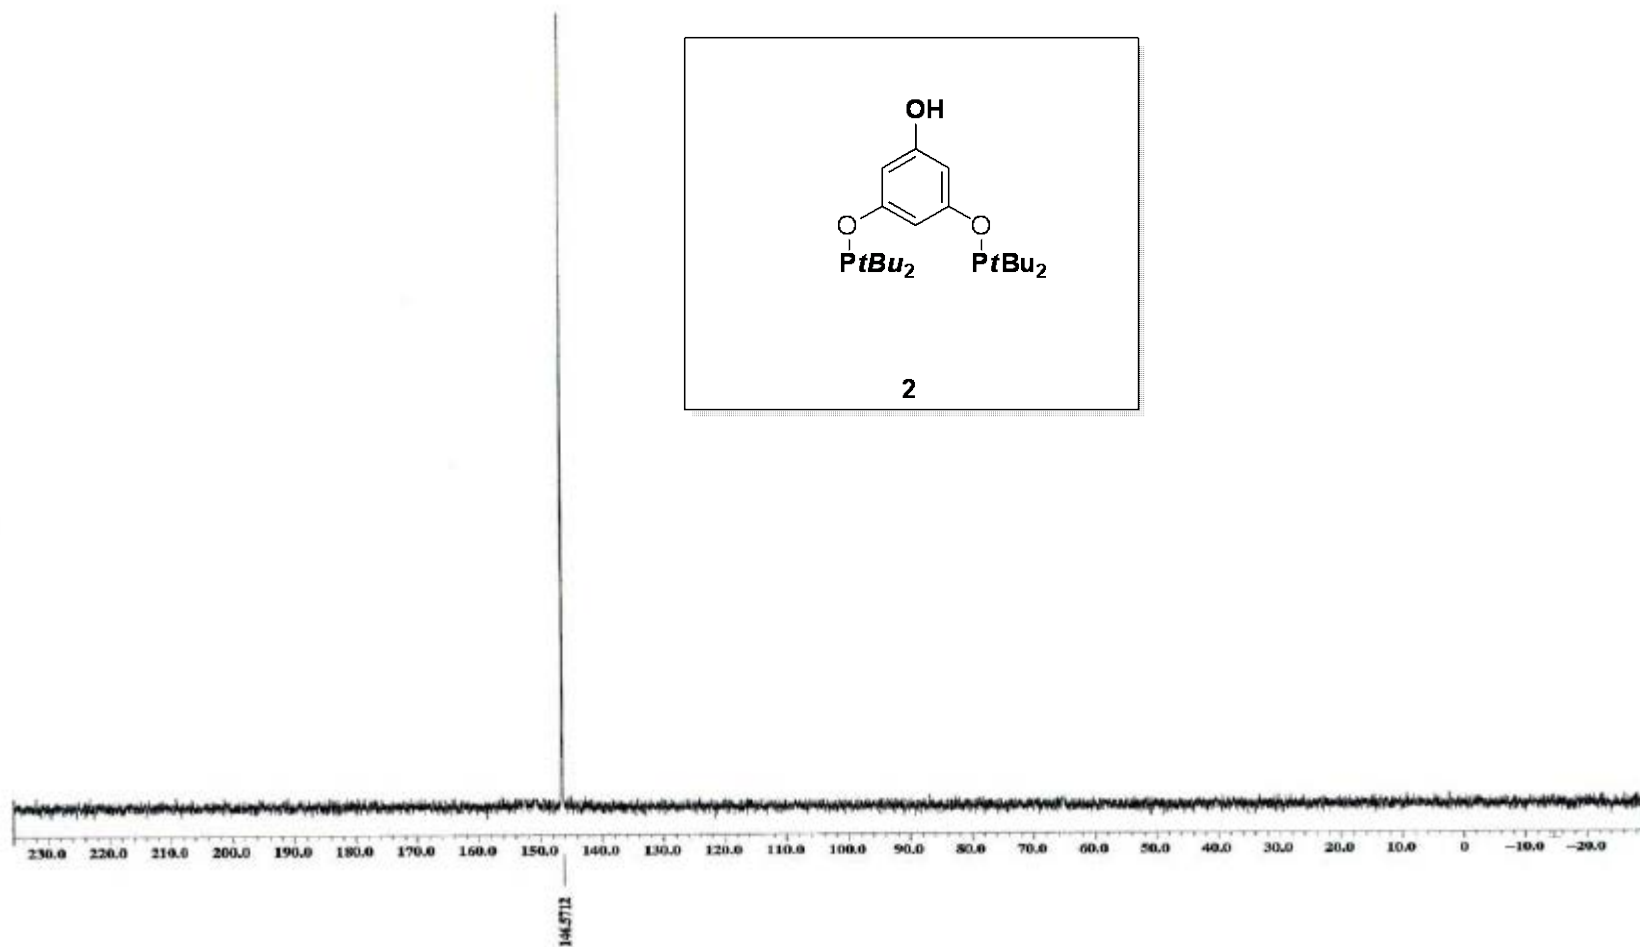

$^{31}\text{P}$  NMR ( $\text{CDCl}_3$ , 25 °C, 121.65 Hz) spectrum of compound 2.

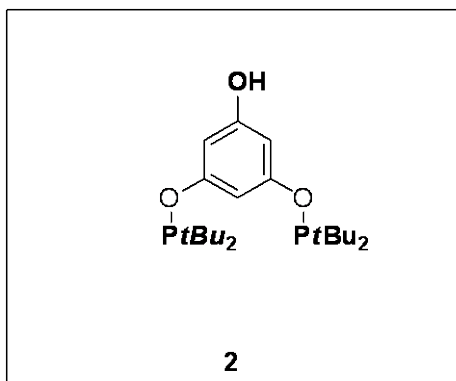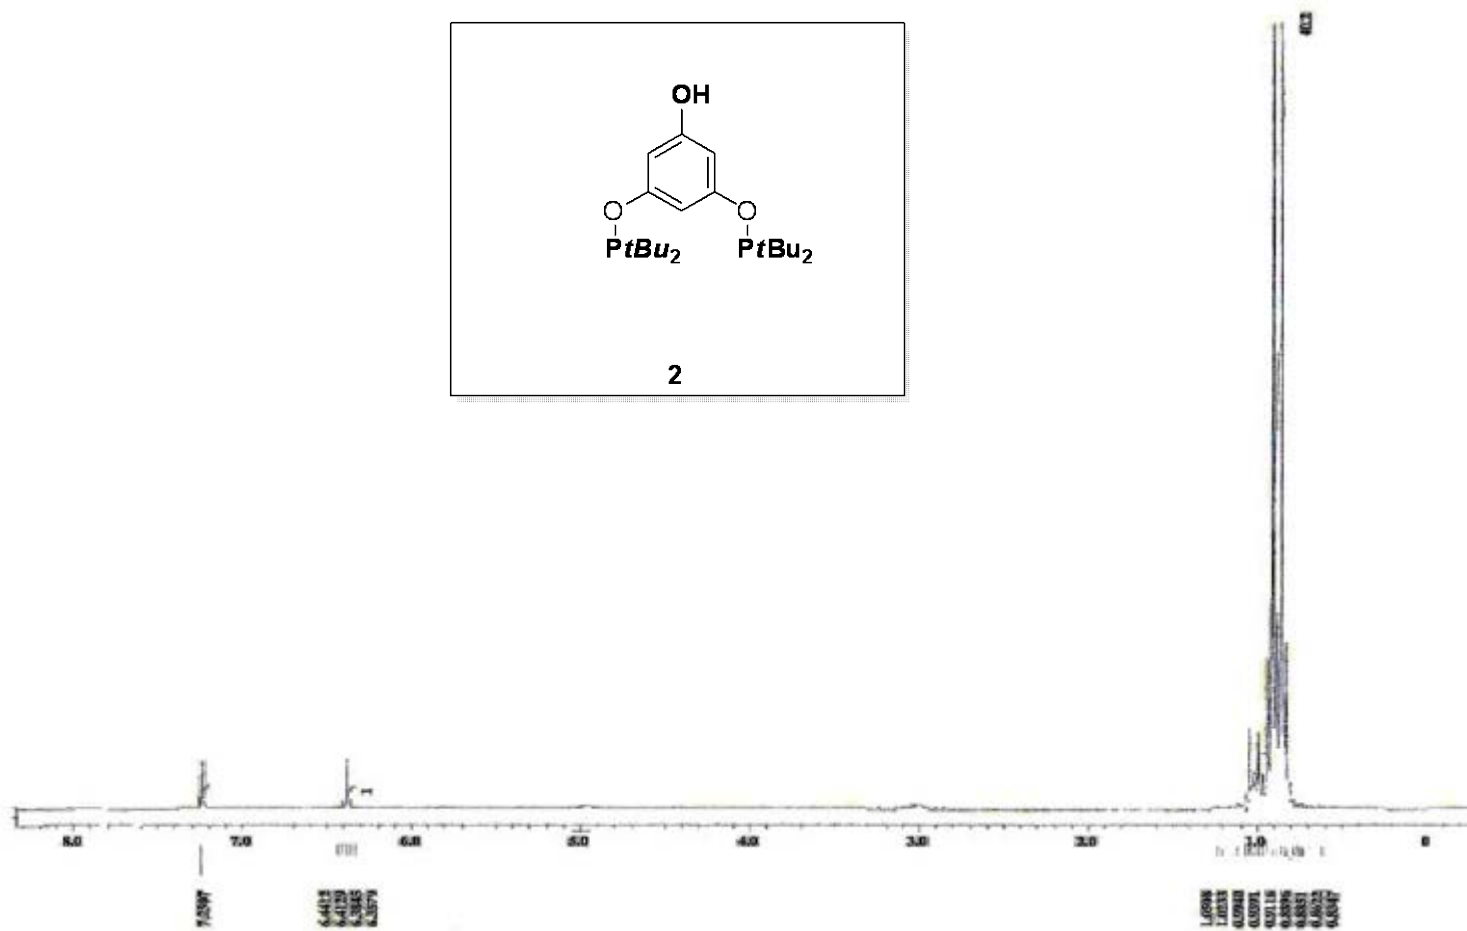

$^1\text{H}$  NMR ( $\text{CDCl}_3$ , 25 °C, 300.52 Hz) spectrum of compound 2.

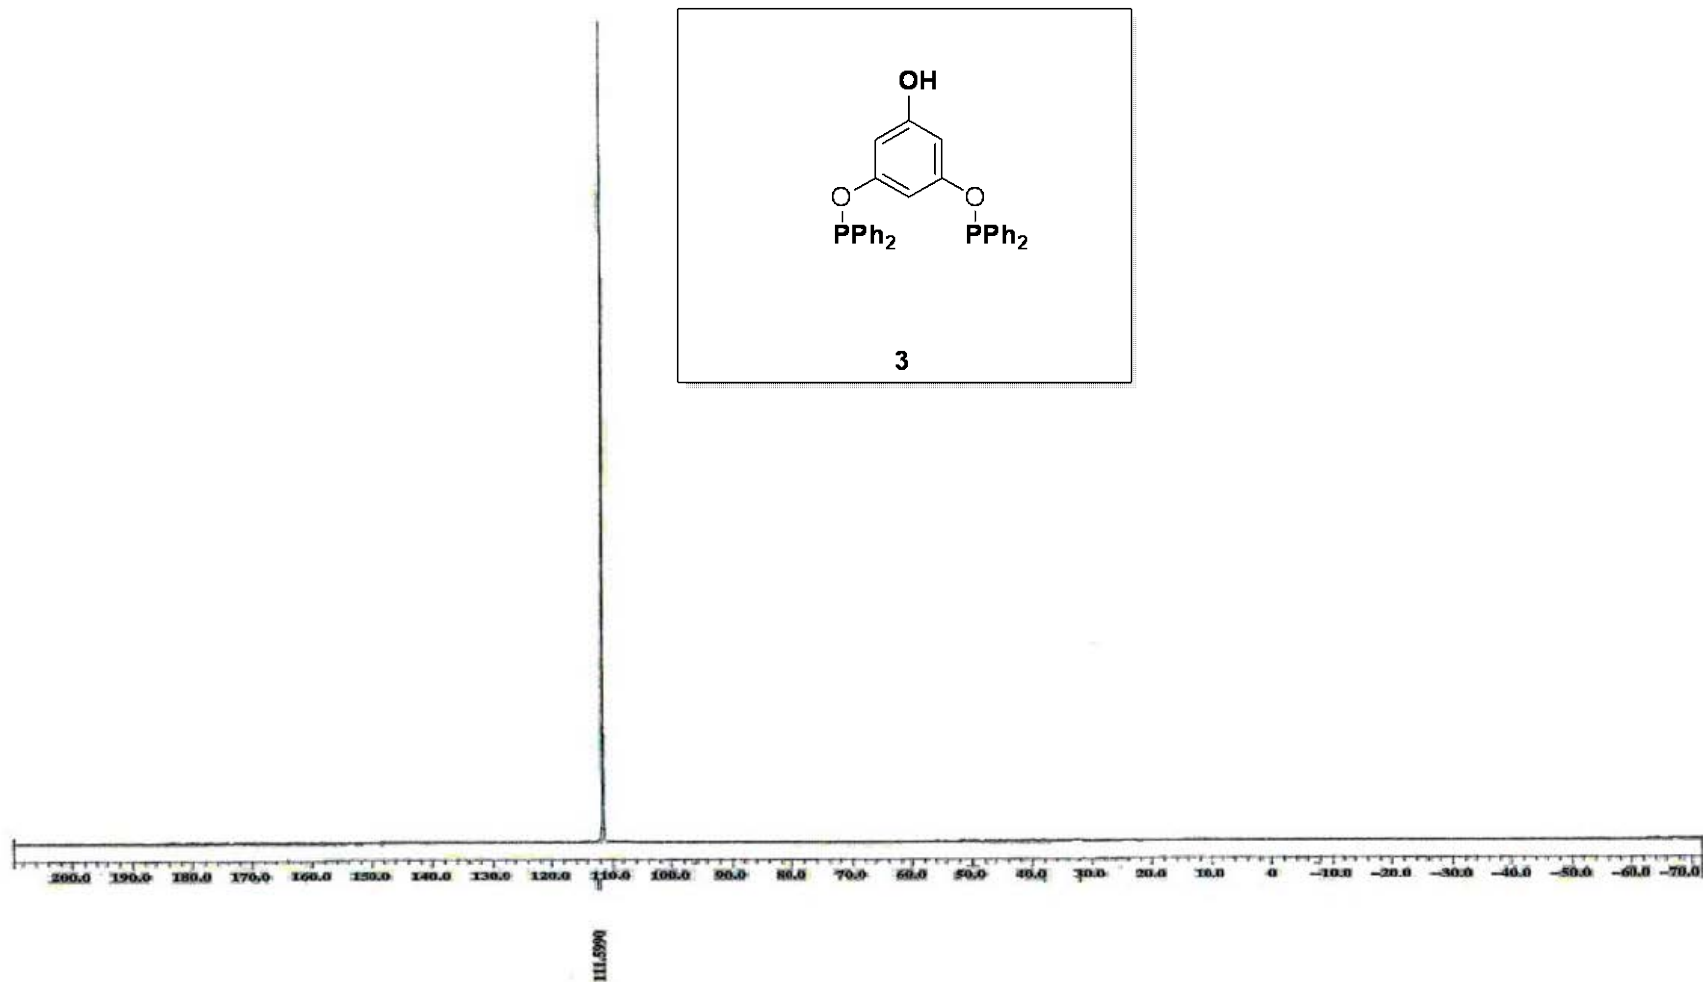

$^{31}\text{P}$  NMR ( $\text{CDCl}_3$ , 25 °C, 121.65 Hz) spectrum of compound **3**.

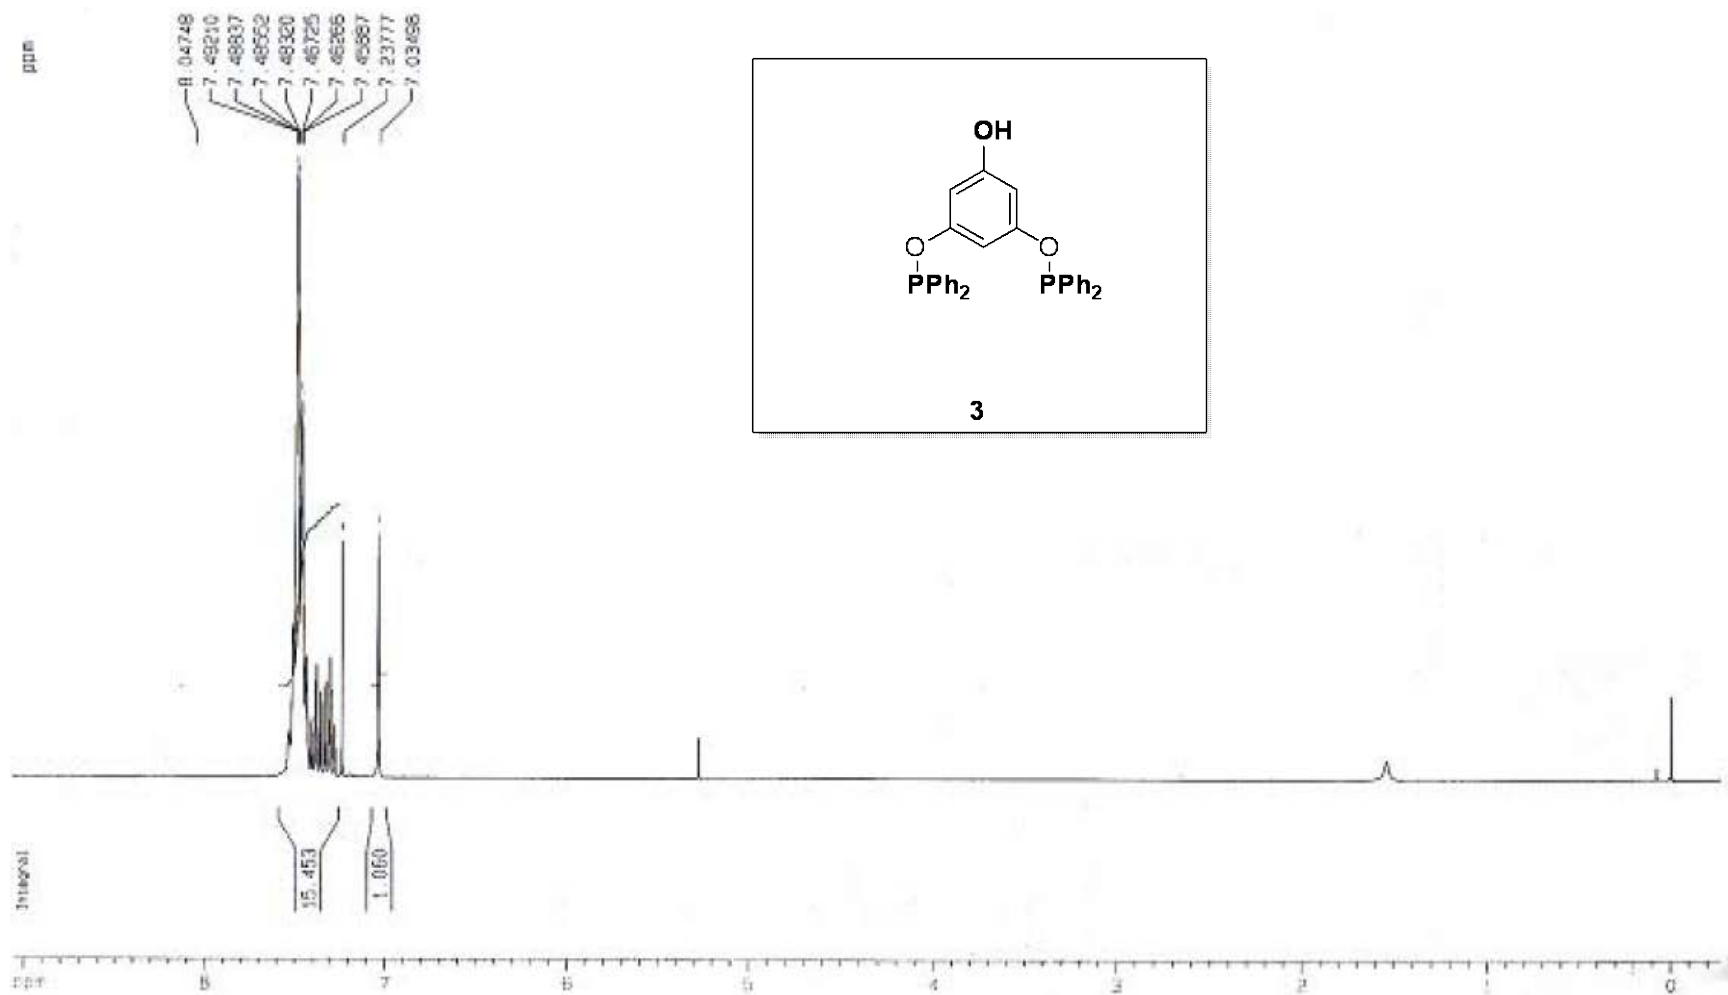

<sup>1</sup>H NMR (CDCl<sub>3</sub>, 25 °C, 300.52 Hz) spectrum of compound **3**.

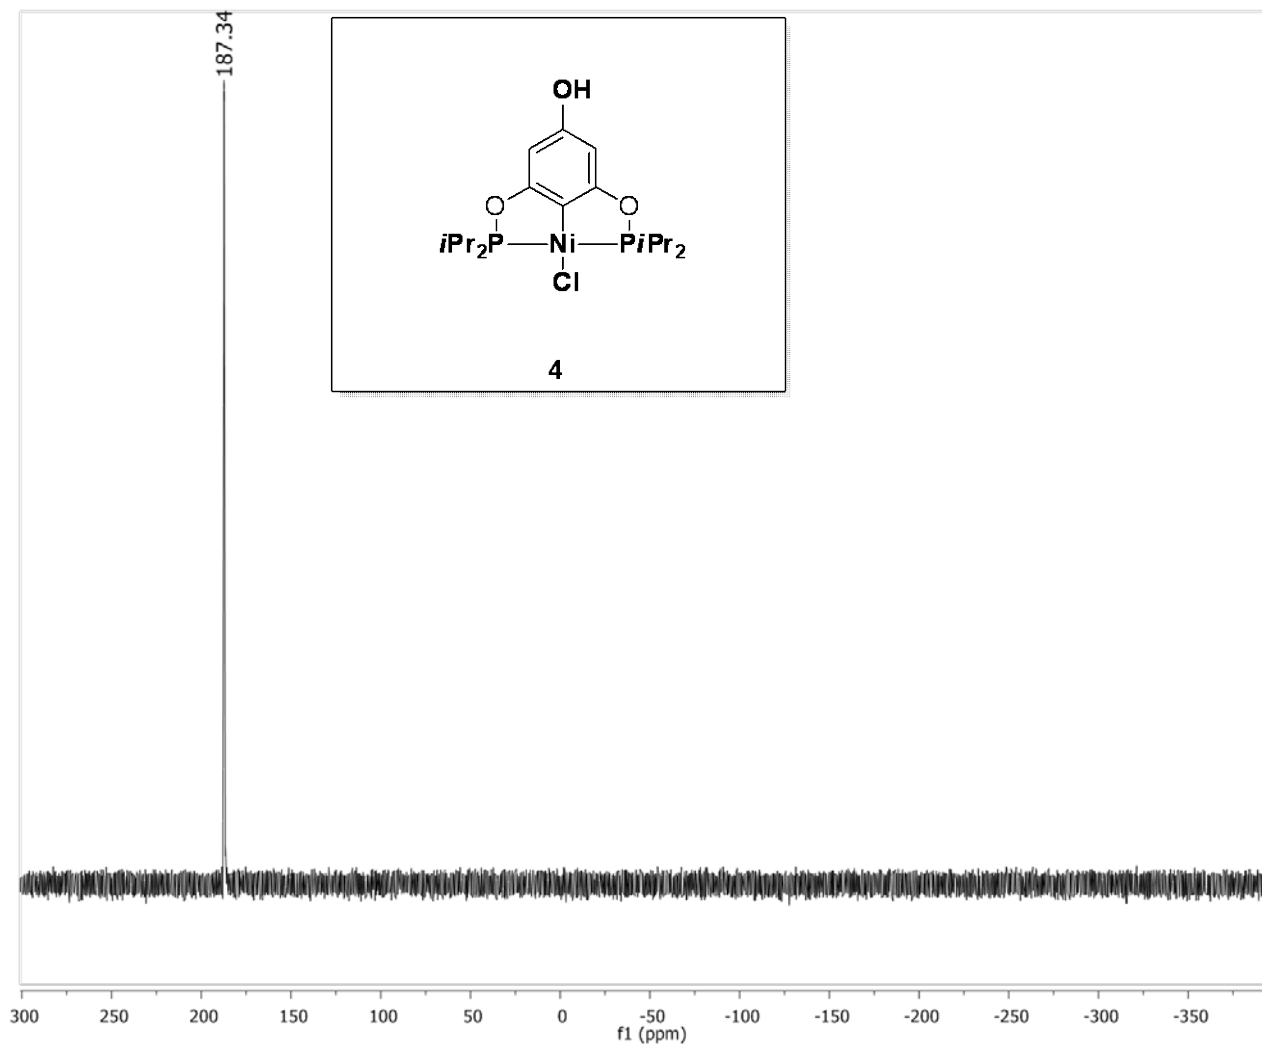

$^{31}\text{P}$  NMR ( $\text{CDCl}_3$ , 25 °C, 121.65 Hz) spectrum of compound 4.



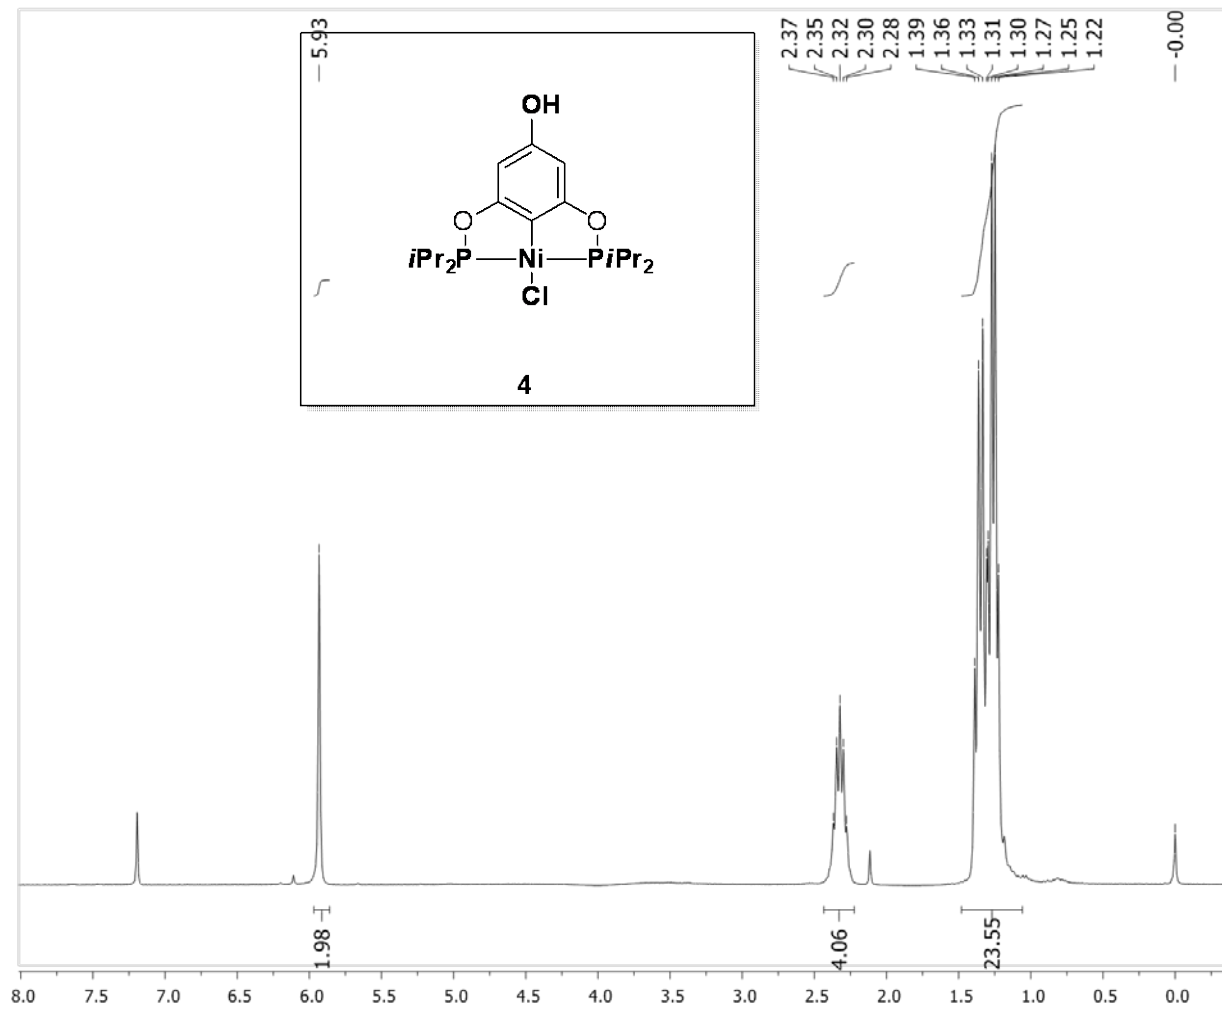

$^1\text{H NMR}$  (CDCl<sub>3</sub>, 25 °C, 300.52 Hz) spectrum of compound 4.

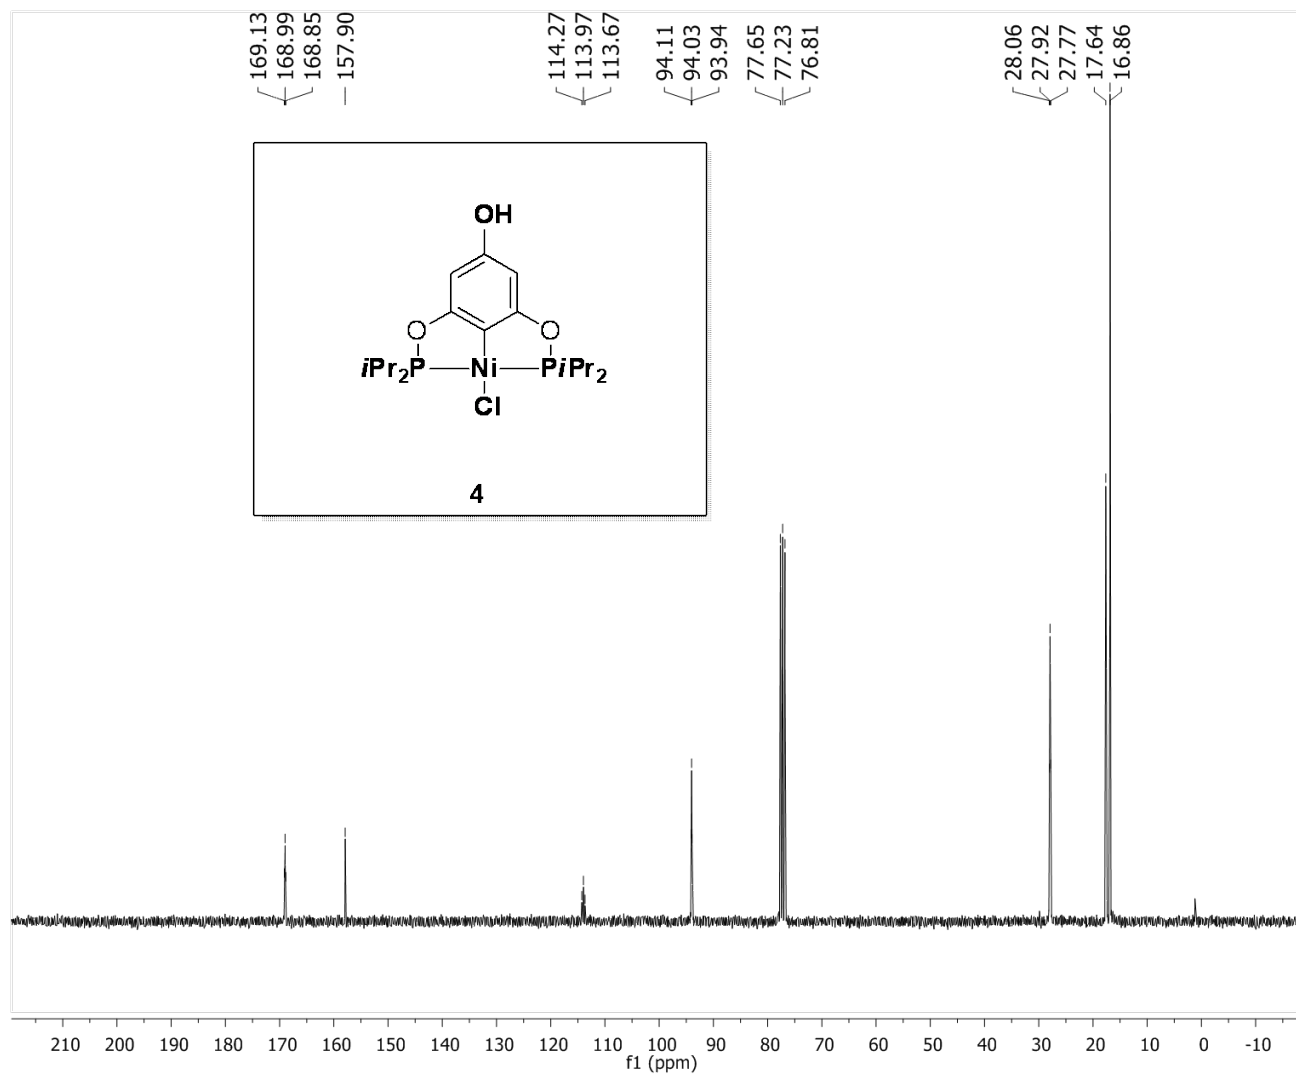

$^{13}\text{C}$  NMR (CDCl<sub>3</sub>, 25°C, 75.57 Hz) spectrum of compound 4.

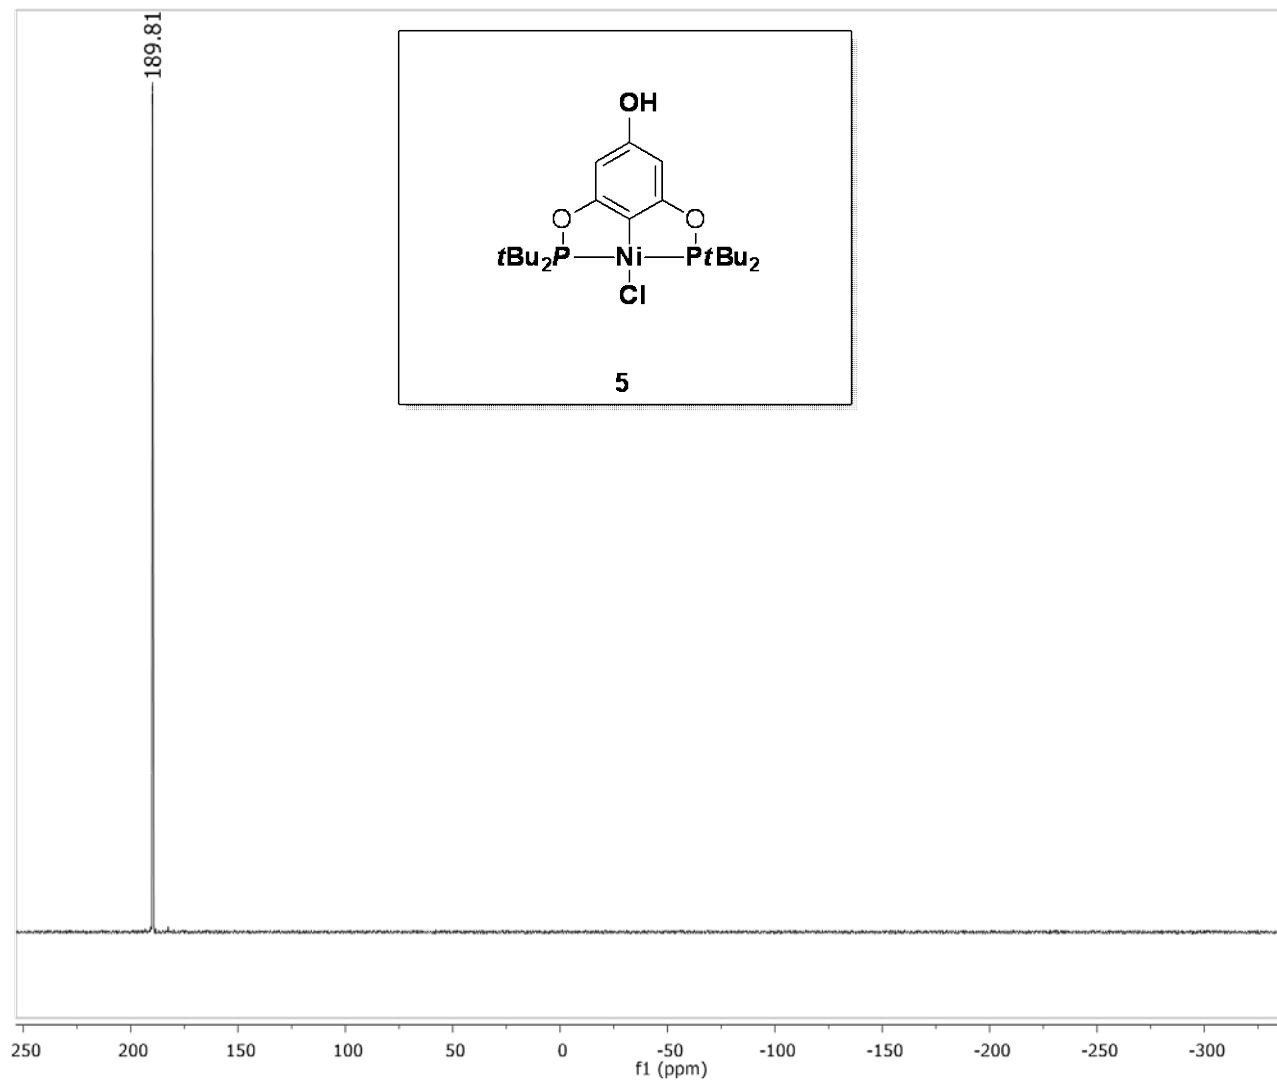

$^{31}\text{P}$  NMR ( $\text{CDCl}_3$ , 25 °C, 121.65 Hz) spectrum of compound 5.

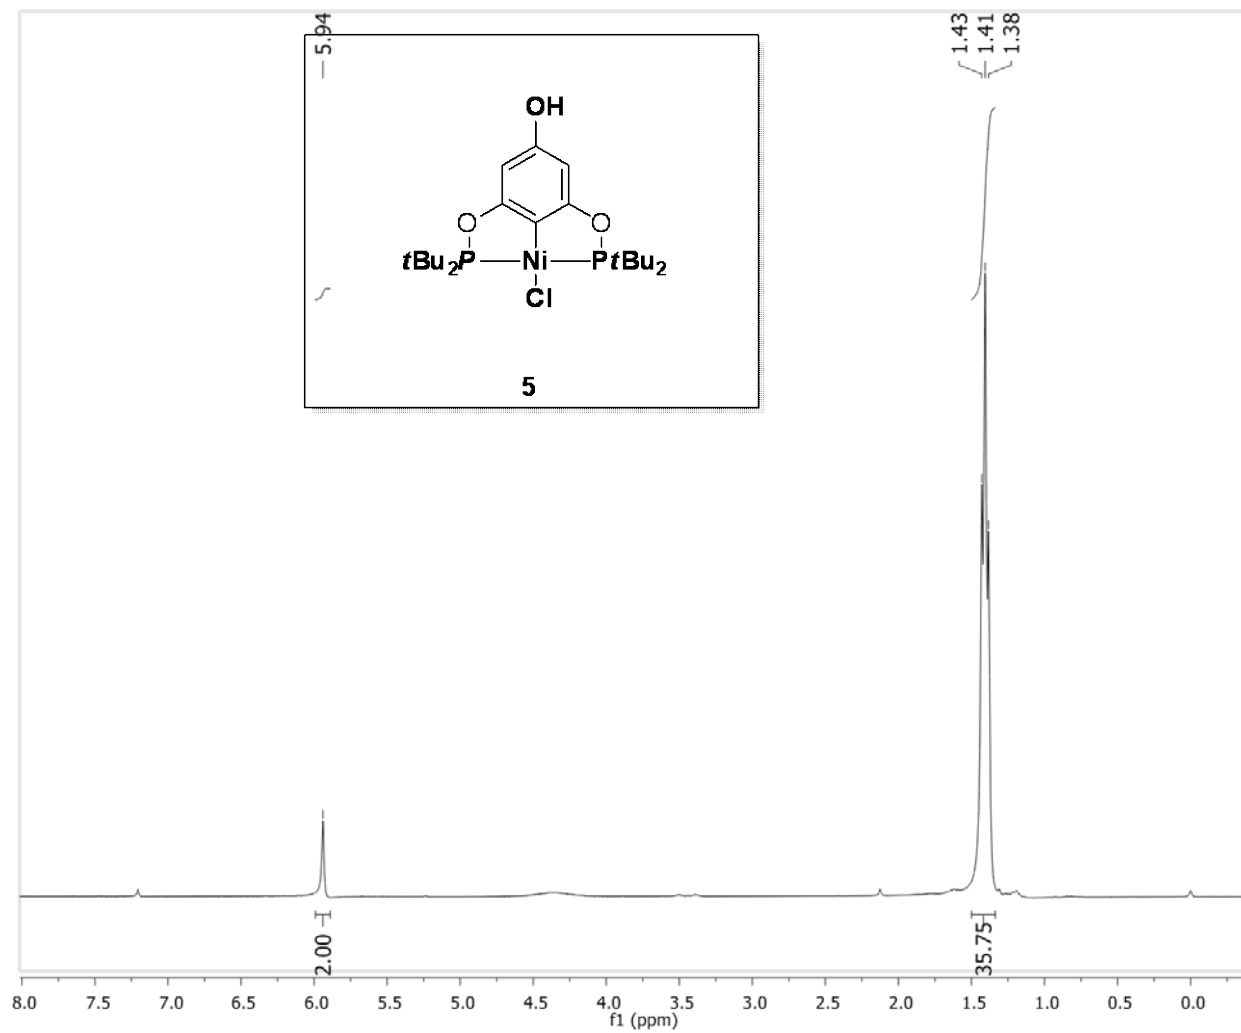

$^1\text{H NMR}$  ( $\text{CDCl}_3$ , 25 °C, 300.52 Hz) spectrum of compound 5.

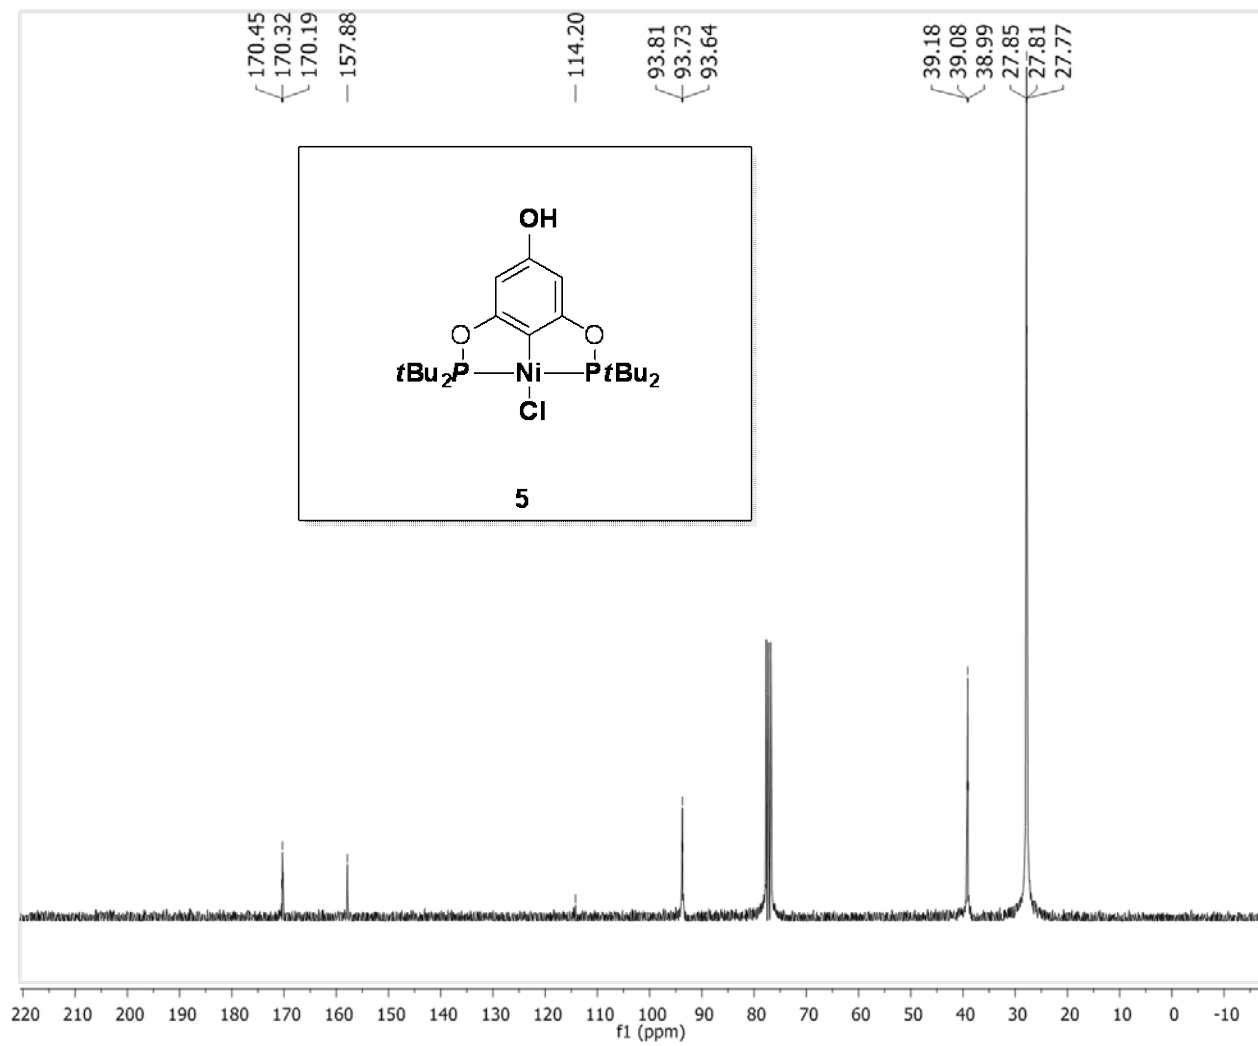

$^{13}\text{C}$  NMR (CDCl<sub>3</sub>, 25°C, 75.57 Hz) spectrum of compound 5.

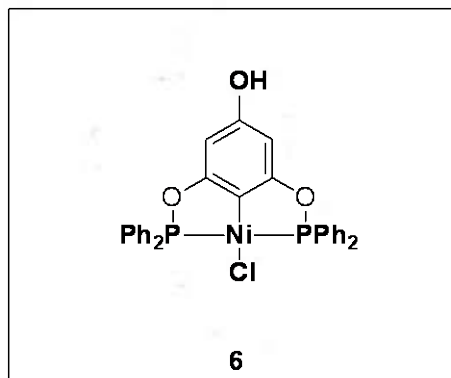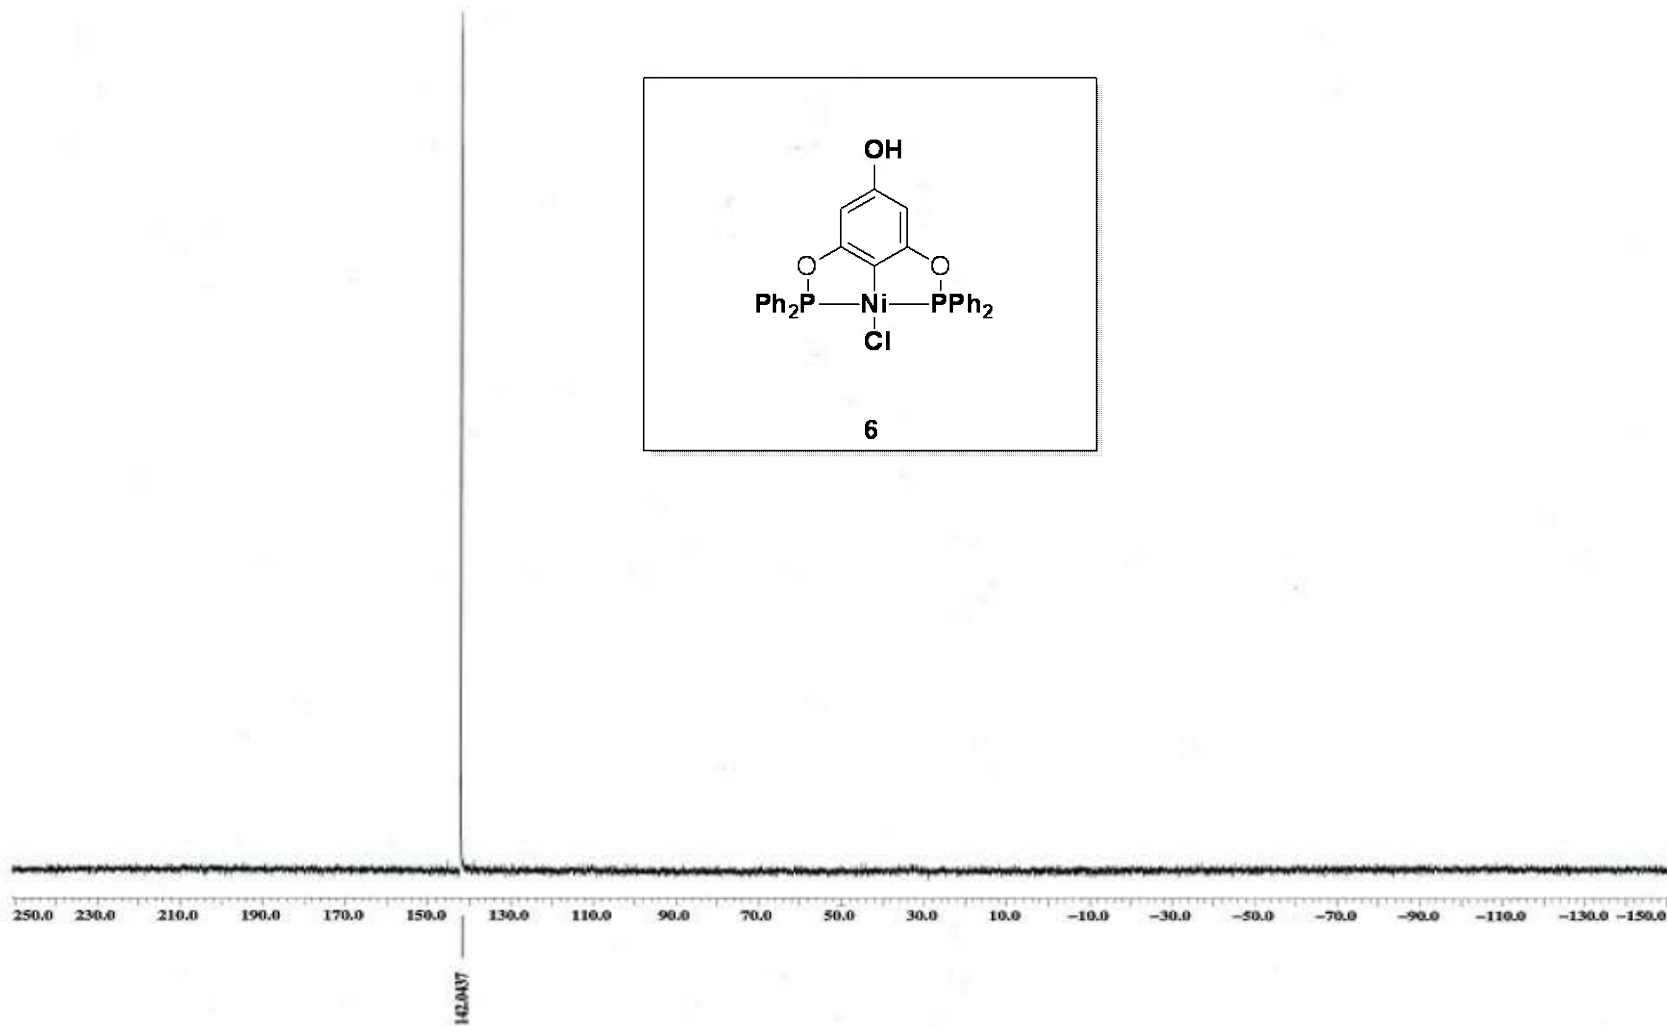

$^{31}\text{P}$  NMR ( $\text{CDCl}_3$ , 25 °C, 121.65 Hz) spectrum of compound 6.

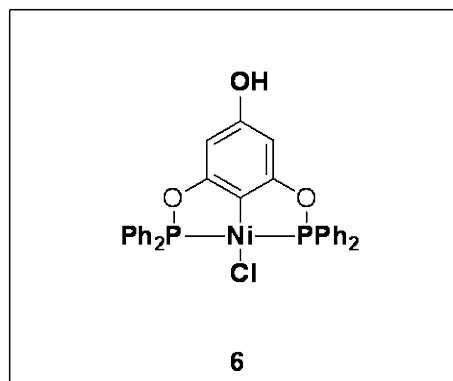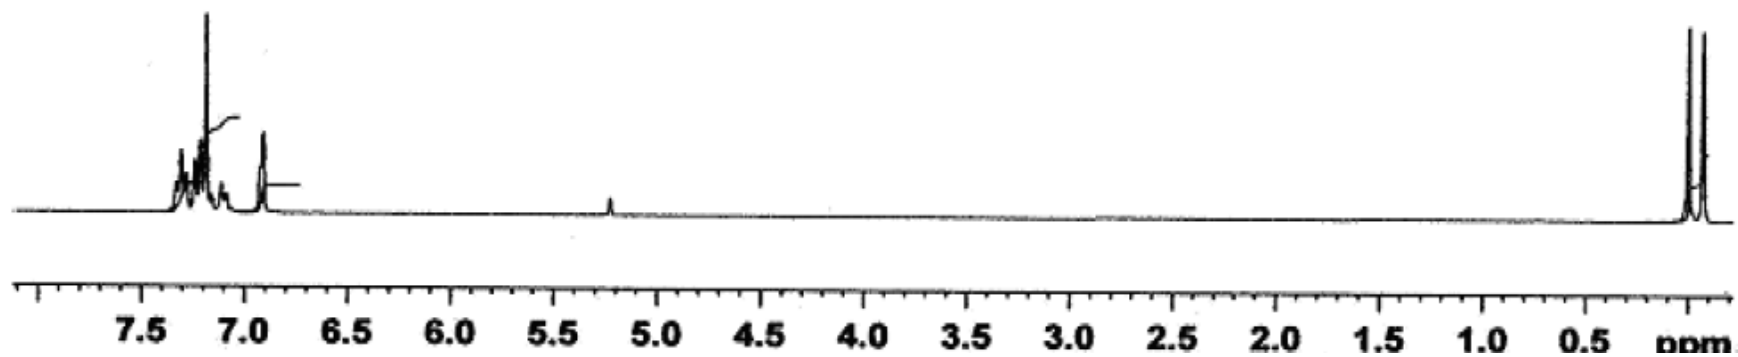

<sup>1</sup>H NMR (CDCl<sub>3</sub>, 25 °C, 300.52 Hz) spectrum of compound 6.

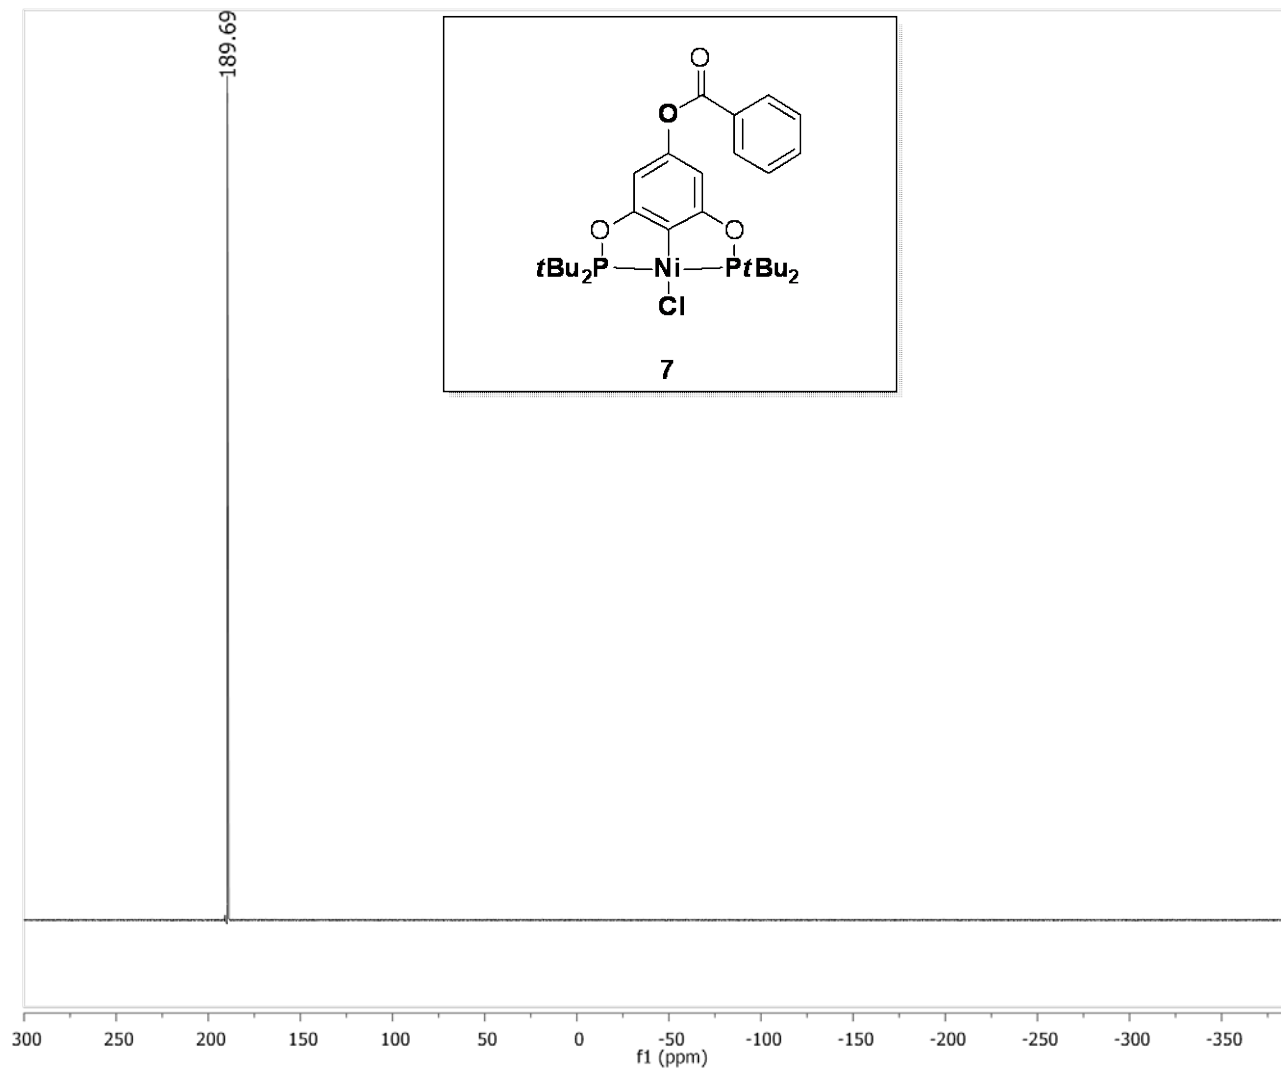

$^{31}\text{P}$  NMR ( $\text{CDCl}_3$ , 25 °C, 121.65 Hz) spectrum of compound 7.



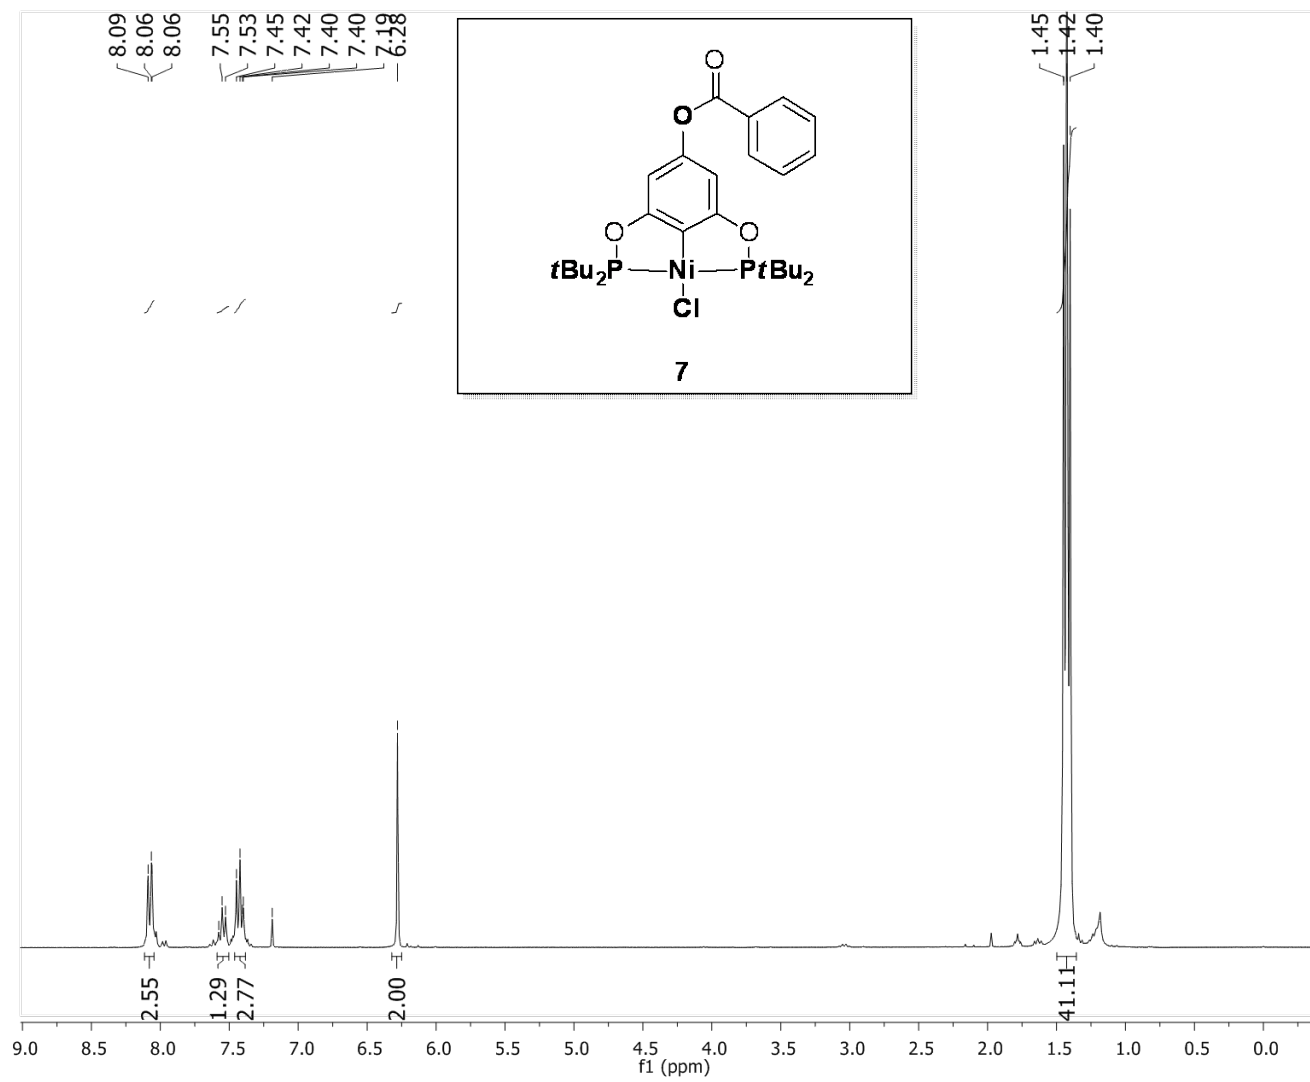

$^1\text{H NMR}$  ( $\text{CDCl}_3$ , 25 °C, 300.52 Hz) spectrum of compound 7.

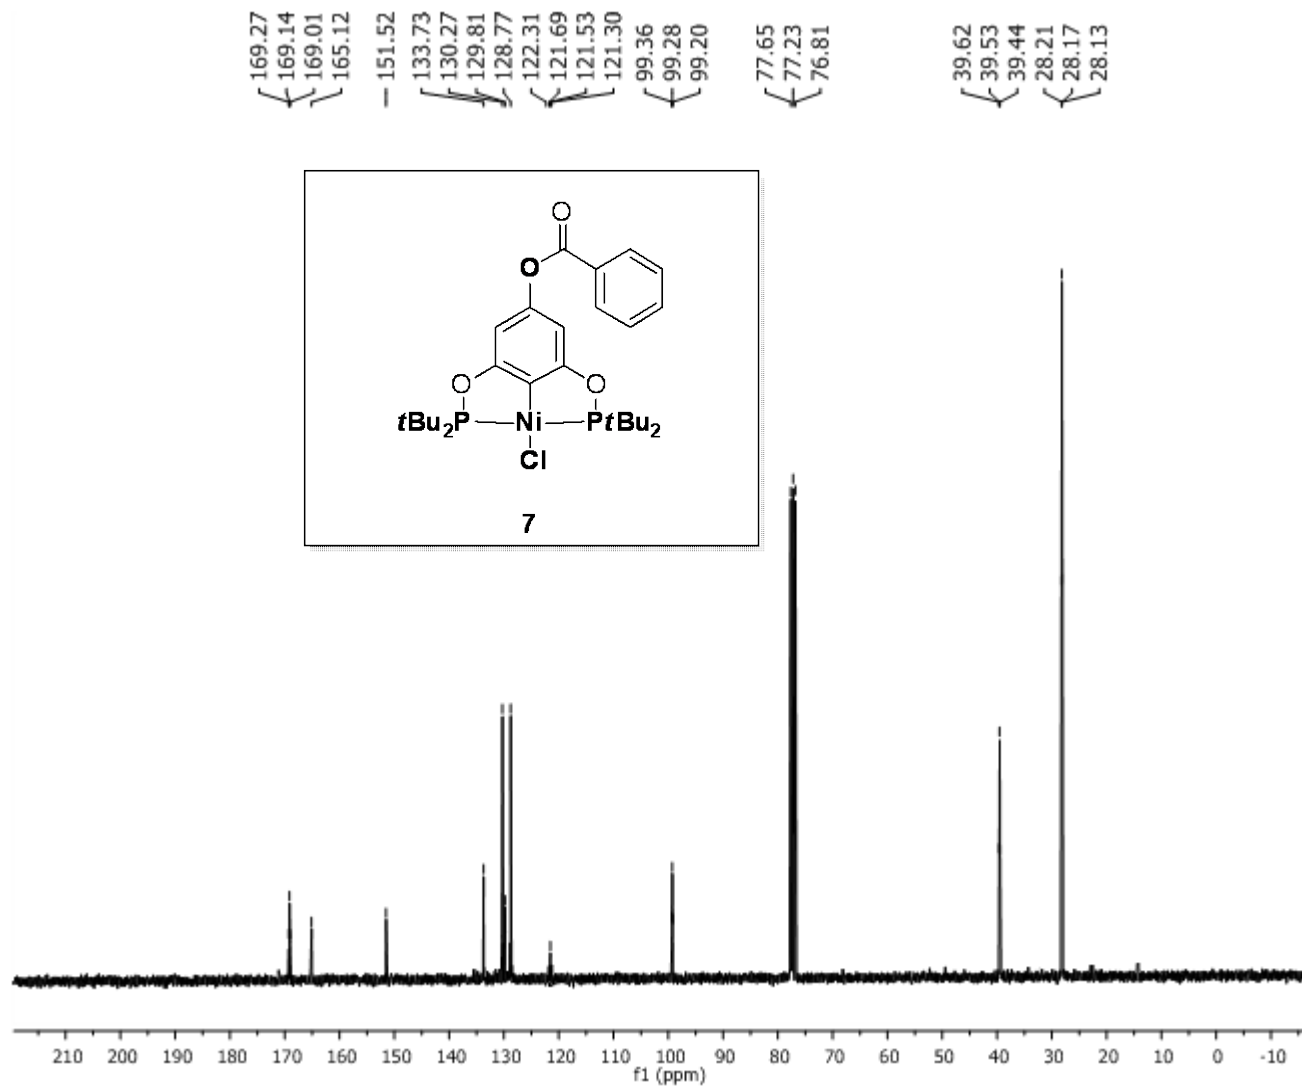

<sup>13</sup>C NMR (CDCl<sub>3</sub>, 25°C, 75.57 Hz) spectrum of compound 7.

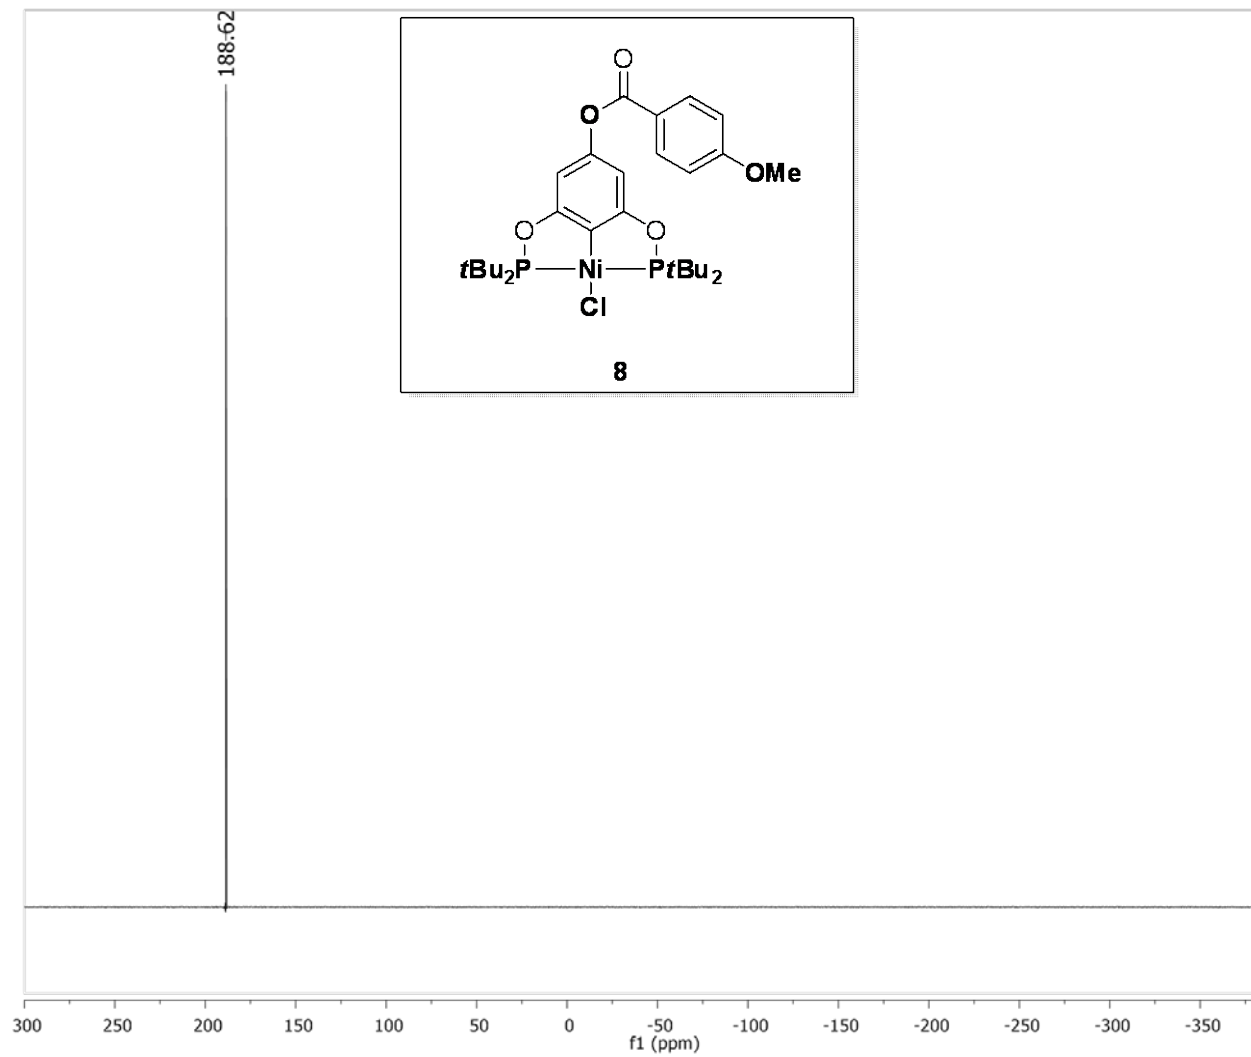

$^{31}\text{P}$  NMR ( $\text{CDCl}_3$ , 25 °C, 121.65 Hz) spectrum of compound **8**.

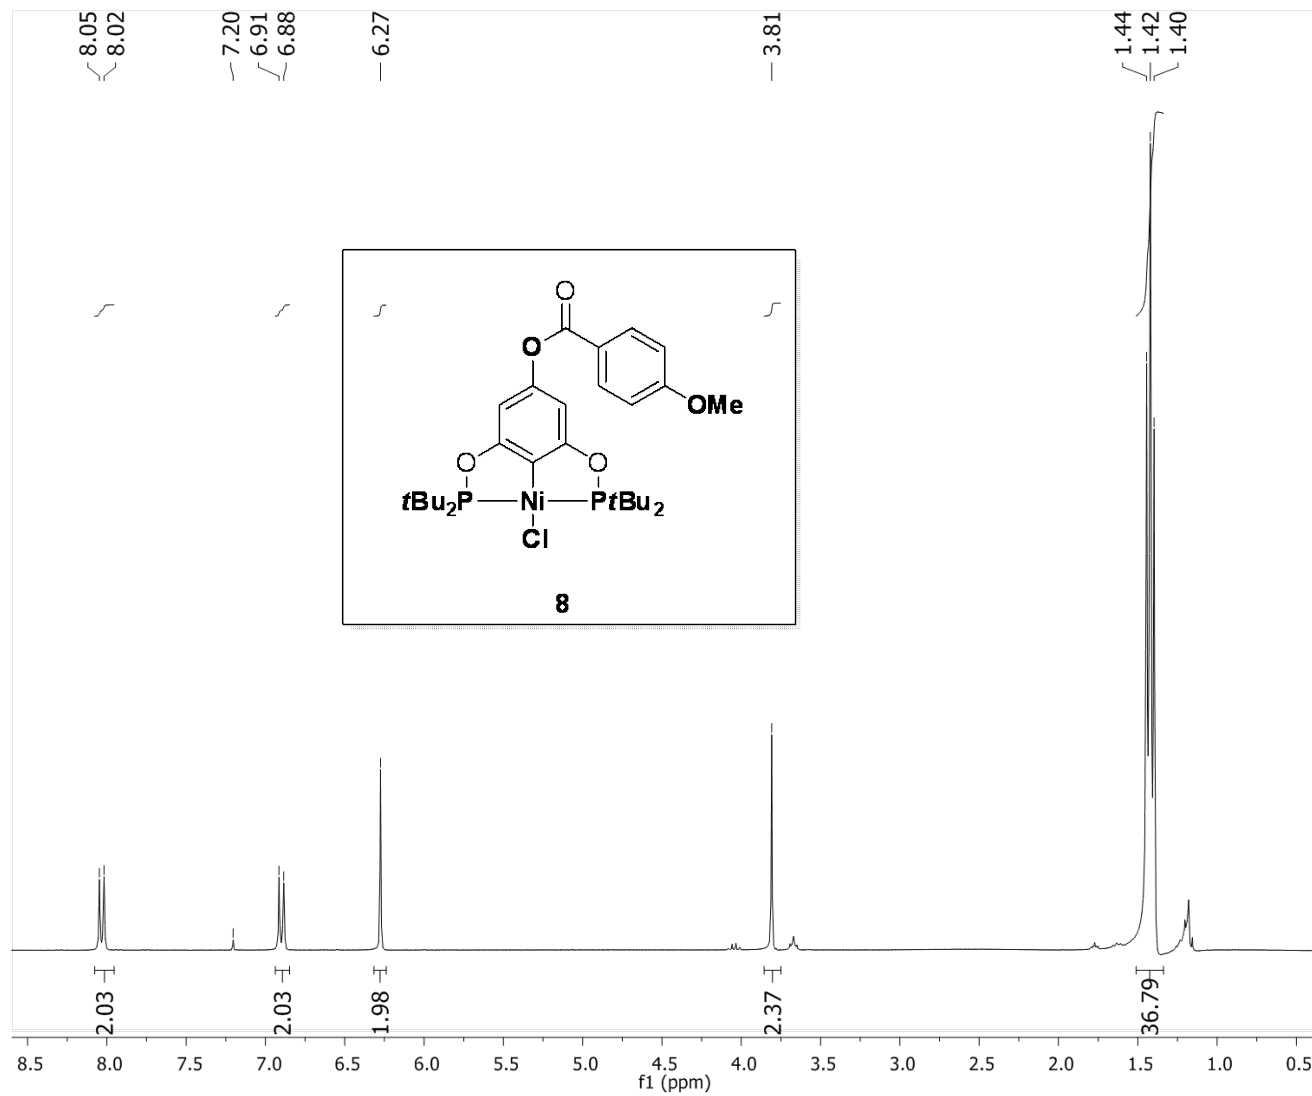

$^1\text{H}$  NMR ( $\text{CDCl}_3$ , 25 °C, 300.52 Hz) spectrum of compound **8**.

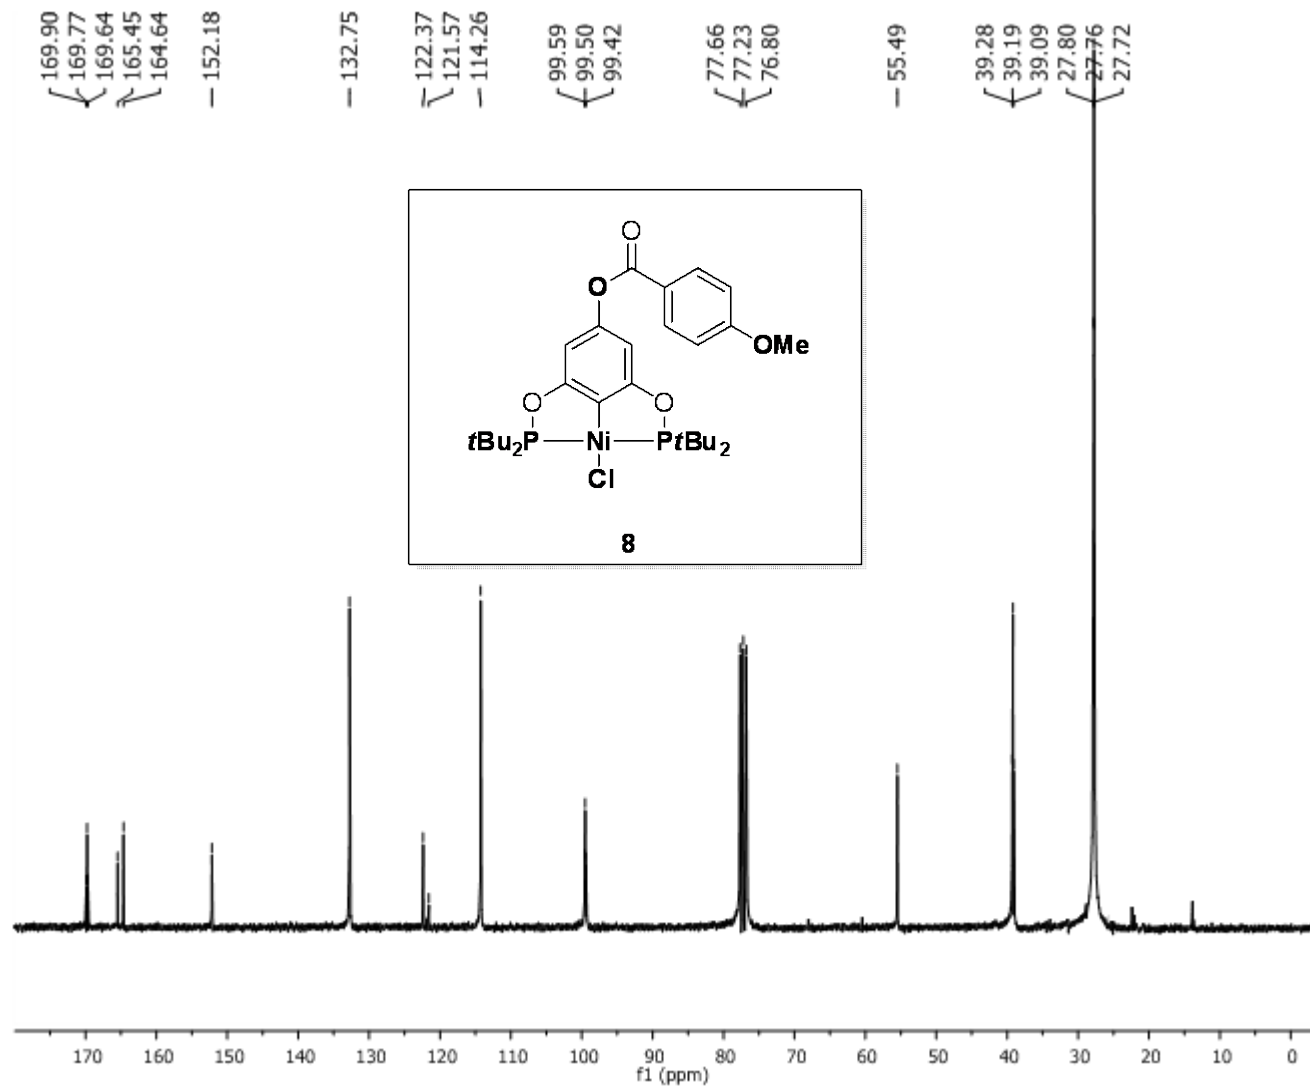

<sup>13</sup>C NMR (CDCl<sub>3</sub>, 25°C, 75.57 Hz) spectrum of compound 8.

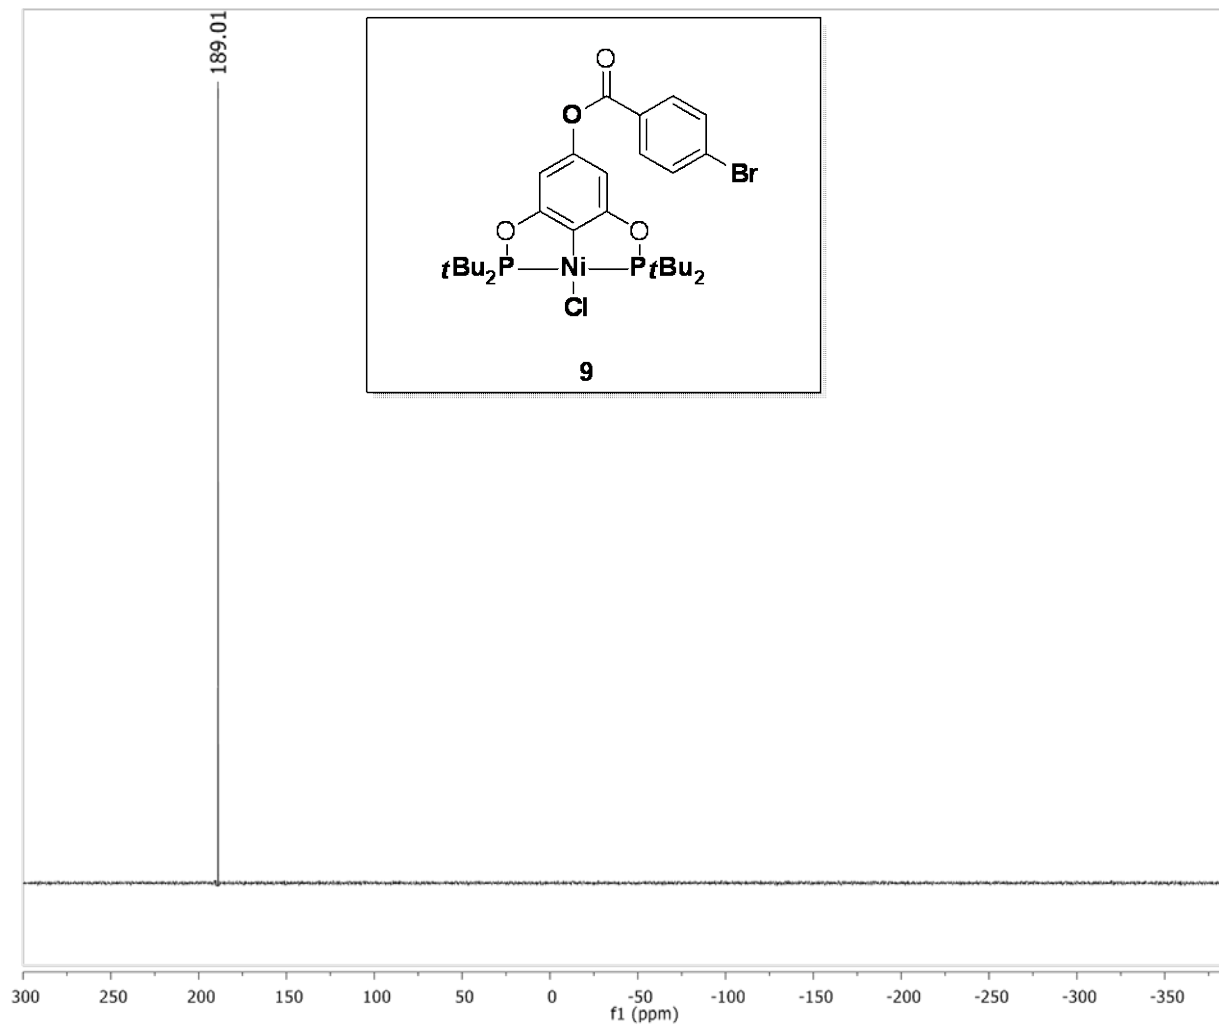

$^{31}\text{P}$  NMR ( $\text{CDCl}_3$ , 25 °C, 121.65 Hz) spectrum of compound 9.

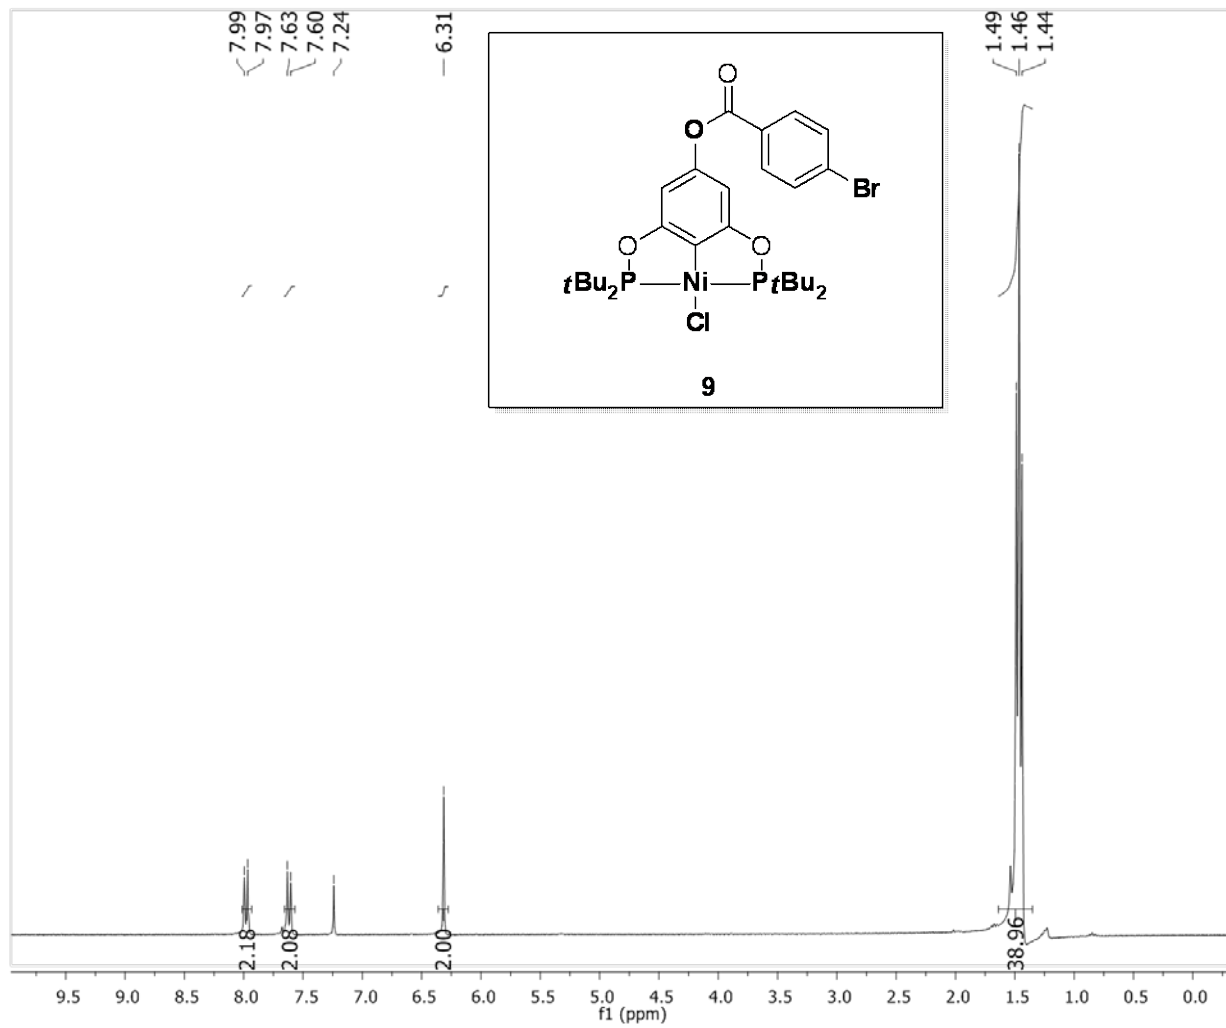

$^1\text{H}$  NMR ( $\text{CDCl}_3$ , 25 °C, 300.52 Hz) spectrum of compound **9**.

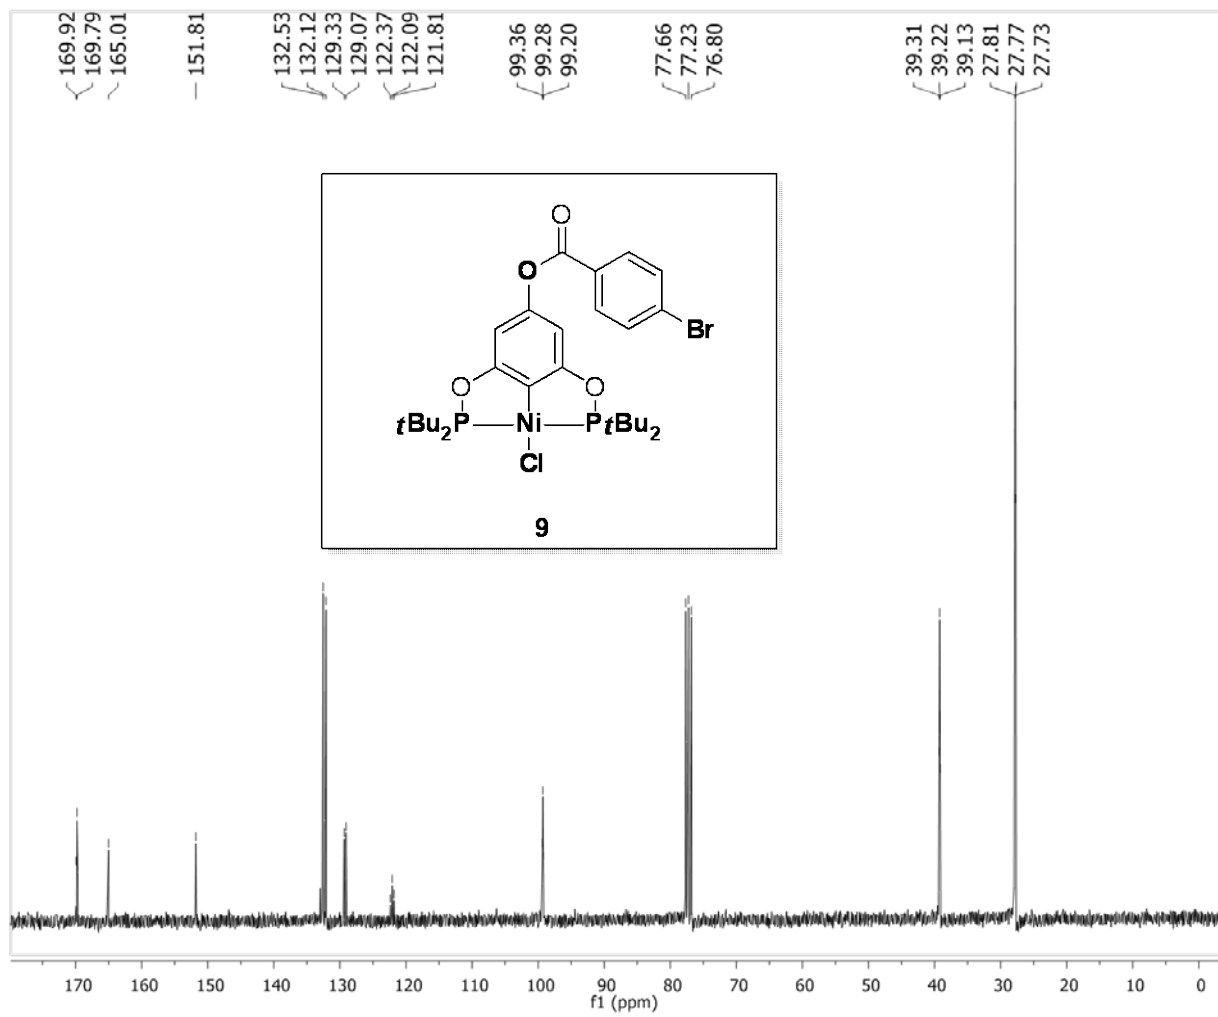

$^{13}\text{C}$  NMR (CDCl<sub>3</sub>, 25°C, 75.57 Hz) spectrum of compound 9.



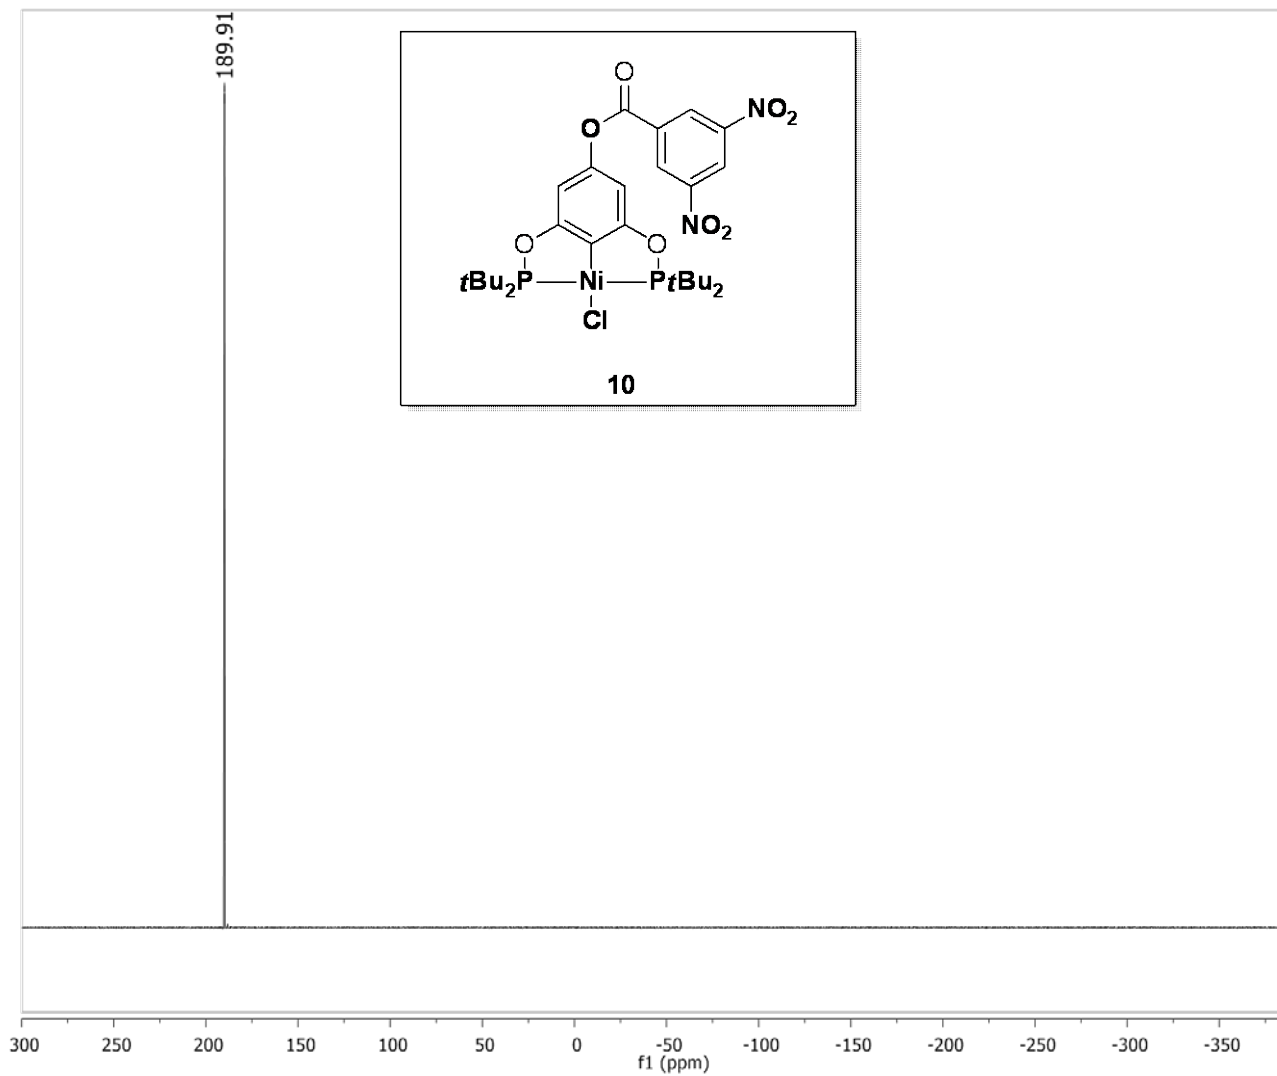

$^{31}\text{P}$  NMR ( $\text{CDCl}_3$ , 25 °C, 121.65 Hz) spectrum of compound 10.

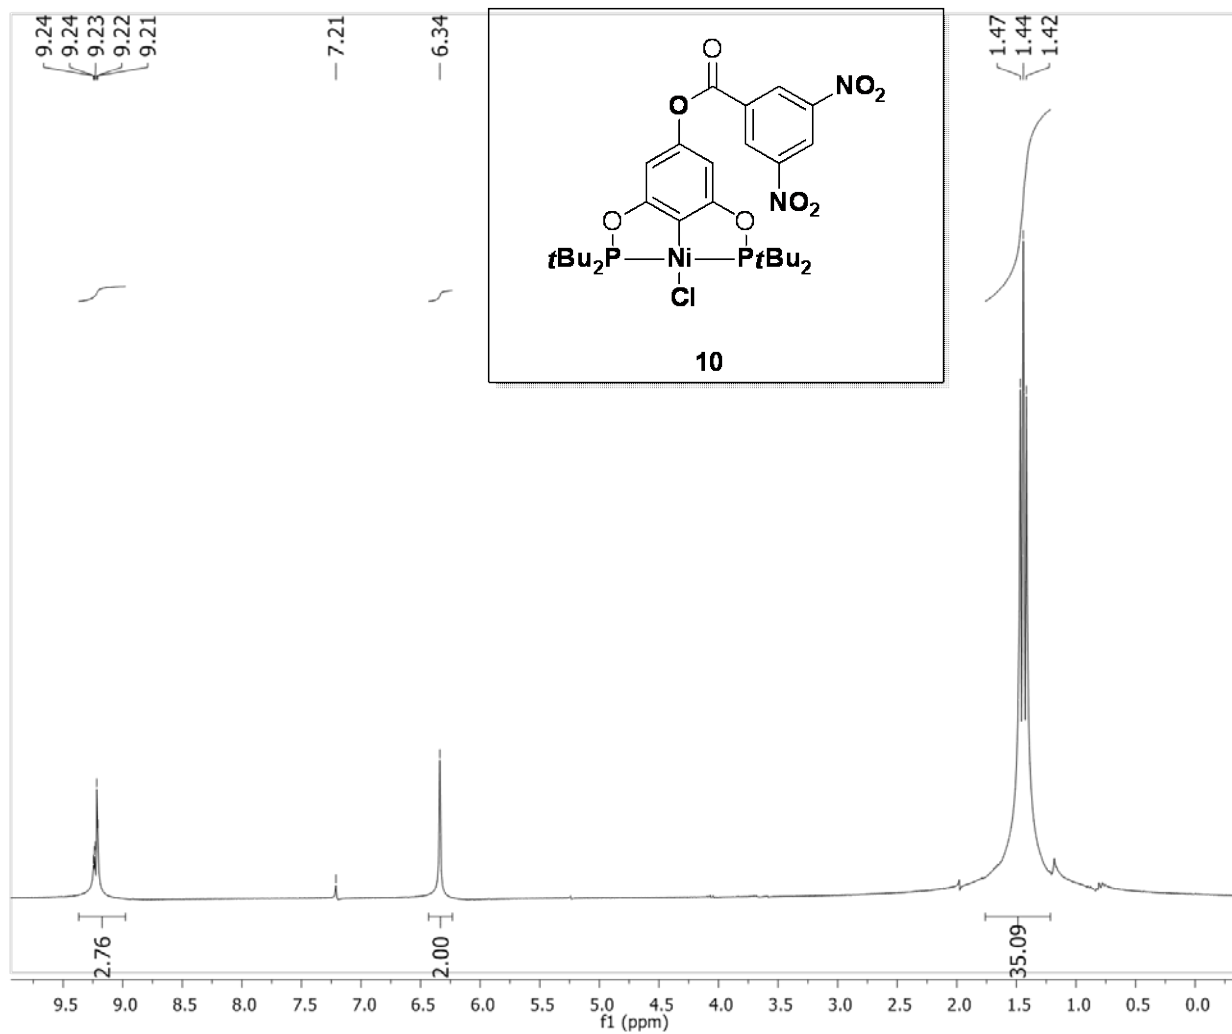

$^1\text{H}$  NMR ( $\text{CDCl}_3$ , 25 °C, 300.52 Hz) spectrum of compound **10**.

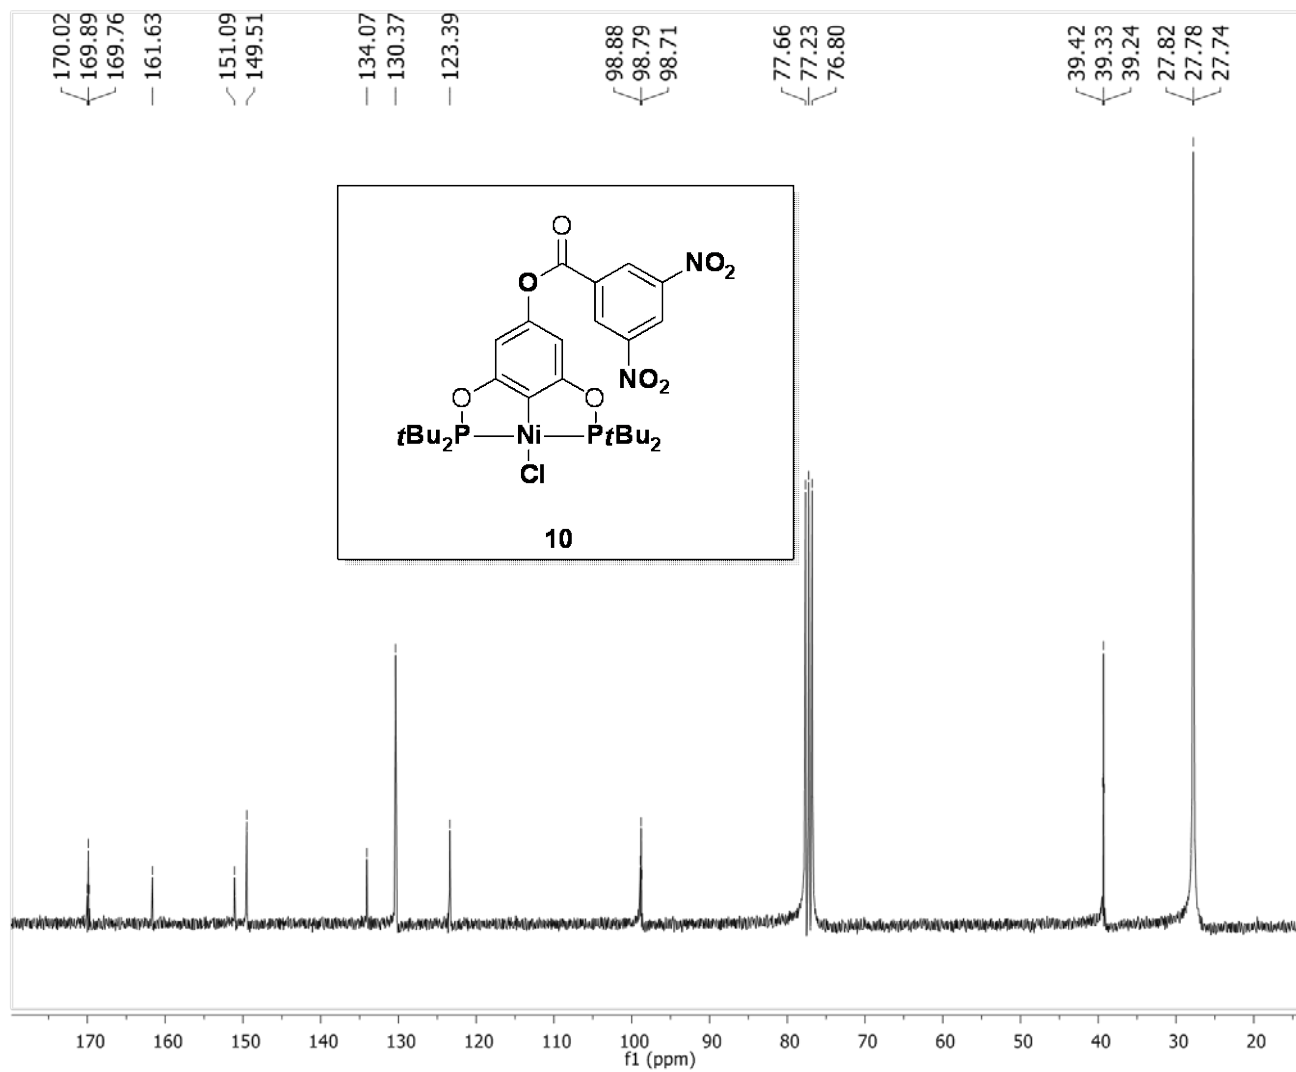

$^{13}\text{C}$  NMR (CDCl<sub>3</sub>, 25°C, 75.57 Hz) spectrum of compound 10.
